# Supplementary material for: Characterization of Cell-Envelope Proteinases from Two Lacticaseibacillus casei Strains Isolated from Parmigiano Reggiano Cheese
Source: MDPI journal article supplement (doi:10.3390/biology11010139), 2022-01-14
Supplement: s1 [file s1]

## Article

# Characterization of cell-envelope proteinases from two *Lactocaseibacillus casei* strains isolated from Parmigiano Reggiano cheese

Lisa Solieri <sup>1</sup>, Laura Sola <sup>1</sup>, Amanda Vaccalluzzo <sup>2</sup>, Cinzia Lucia Randazzo <sup>2,3</sup>, Serena Martini <sup>1</sup> and Davide Tagliazucchi <sup>1\*</sup>

<sup>1</sup> Department of Life Sciences, University of Modena and Reggio Emilia, Via Amendola, 2 - Pad. Besta, 42100 Reggio Emilia, Italy; lisa.solieri@unimore.it; laura.sola@unimore.it; serena.martini@unimore.it; davide.tagliazucchi@unimore.it

<sup>2</sup> Department of Agriculture, Food and Environment, University of Catania, via Santa Sofia, 100, 95123 Catania, Italy; amanda.vaccalluzzo@unict.it; cranda@unict.it

<sup>3</sup> ProBioEtna srl, Spin off University of Catania, via Santa Sofia, 100, 95123 Catania, Italy; cranda@unict.it

\* Correspondence: davide.tagliazucchi@unimore.it; Tel.: +39 0522 522060

**Citation:** Solieri, L.; Sola, L.; Vaccalluzzo, A.; Randazzo, C.L.; Martini, S.; Tagliazucchi, D. Characterization of Cell-Envelope Proteinases from Two *Lactocaseibacillus casei* Strains Isolated from Parmigiano Reggiano Cheese. *Biology* **2022**, *11*, 139. <https://doi.org/10.3390/biology11010139>

Academic Editor: Rosa Siciliano

Received: 9 November 2021

Accepted: 12 January 2022

Published: 14 January 2022

**Publisher's Note:** MDPI stays neutral with regard to jurisdictional claims in published maps and institutional affiliations.

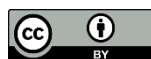

**Copyright:** © 2022 by the authors. Licensee MDPI, Basel, Switzerland. This article is an open access article distributed under the terms and conditions of the Creative Commons Attribution (CC BY) license (<https://creativecommons.org/licenses/by/4.0/>).

**Simple Summary:** Lactic acid bacteria are nutritionally fastidious microorganisms typically used in the production of fermented dairy foods. The lactic acid bacteria proteolytic system is crucial for their growth in milk and play a paramount role in developing the organoleptic and healthy properties of fermented dairy foods. Cell-envelope proteinases are the first component of this system, responsible for the degradation of caseins into short peptides. In the present work, the cell-envelope proteinases of two highly-proteolytic *Lactocaseibacillus casei* strains, previously isolated from ripened Parmigiano Reggiano cheese, were characterized from a genetic and biochemical point-of-view. Two different *prt* genes existed in the genome of both the strains but only one, named PrtR1, was expressed. PrtR1 proteins extracted from both the strains displayed the highest activity at 40°C and pH 7. Interestingly, PrtR1 extracted from *Lactocaseibacillus casei* PRA205 retained some residual activity at 5°C and at pH 4. These important bio-technological features can be exploited in the production of fermented dairy products. Peptidomics analysis revealed that both the proteinases were able to release  $\beta$ - and  $\alpha$ S1-casein-derived bioactive peptides, suggesting that *Lactocaseibacillus casei* can be a source of new proteinases that can be exploited for the formulation of dairy beverages or hydrolysates enriched in bioactive peptides.

**Abstract:** In the present work, two cell-envelope proteinases (CEPs) from *Lactocaseibacillus casei* strains PRA205 and 2006 have been characterized at both the biochemical and genetic levels. The genomes of both the *L. casei* strains included two putative CEPs genes *prtP2* and *prtR1*, but only *prtR1* was transcribed. The extracted PrtR1 proteinases were serine proteinase with optimal activity at 40 °C and pH 7.5 and activated by Ca<sup>2+</sup> ions. Interestingly, PrtR1 from *L. casei* PRA205 exhibited high residual activity at pH 4 and at 5 °C, suggesting its possible exploitation for fermented food production. The caseinolytic activity against  $\alpha$ S1- and  $\beta$ -casein indicated that both the PrtR1 belong to PI/PIII type. These PrtR1 cleaved  $\beta$ -casein peptide bonds preferentially when amino acid M or N were present at the P1 sub-site and amino acid A and D at the P1' sub-site. Several bioactive peptides were found to be released from PrtR1 after  $\alpha$ S1- and  $\beta$ -casein hydrolysis.

**Keywords:** lactic acid bacteria; fermented food; functional food; bioactive peptides; protease; peptidomics

## 1. Supplementary Materials and Methods

### 1.1 *mutL* gene-targeted multiplex PCR assay and 16S rRNA gene re-sequencing

Species attribution was confirmed by *mutL* gene-targeted multiplex PCR assay, according to Bottari et al. [1]. Primers used were listed in Table S1. Briefly, PCR amplification reactions were carried out in a final volume of 20 µL containing 1X DreamTaq Green Buffer (containing 2 mM MgCl<sub>2</sub>), 200 µM of each dNTP, template DNA, 0.5 U of DreamTaq Green DNA polymerase and 0.25 µM of each primer.

**Table S1** Primers used in *mutL* gene-targeted multiplex PCR

| Primer name | Sequence (5'→3')          | Species target                   | Expected length (bp) |
|-------------|---------------------------|----------------------------------|----------------------|
| CZfor       | CAGCGCTGGTGAAGACTTG       | <i>L. casei</i> / <i>L. zeae</i> | 666                  |
| PC2a        | GGATTGGGTTTTGCGTGATGGTCGC | <i>L. paracasei</i>              | 253                  |
| RHfor       | GACTTCTCAACCAGCAGCGCAGA   | <i>L. rhamnosus</i>              | 801                  |
| CPRrev      | TGCATTTCCCGCTTTCATGACT    | unique                           | na                   |

Abbreviation: na, not applicable

The cycling parameters of *mutL* gene-targeted multiplex PCR assay included initial denaturation at 94 °C for 5 min; 35 cycles of 94 °C for 30 s, annealing at 68 °C for 30 s, and extension at 72 °C for 45 s; final extension at 72 °C for 5 min. Finally, aliquots of 10 µL PCR products were detected on 1.8% (w/v) agarose gel containing ethidium bromide (0.5 mg/mL) in 0.5X TBE buffer at constant voltage of 90 V for 1 h at room temperature. As molecular-weight standard was used GeneRuler 100 bp DNA ladder (Thermo Fisher Scientific, Waltham, MA). Reference strains were *L. rhamnosus* 0503 [2], *L. rhamnosus* PRA161 [3], *L. casei* PRA041 [3], and *L. casei* DSM2011<sup>T</sup>.

The 16S rRNA gene resequencing of strain 2006 was carried out as reported by Tagliazucchi et al [2] with external primer 27f [4] and the internal primer WLAB2 (5'-TCGAATTAAACCACATGCTCCA-3') [5]. The *mutL* and 16S rRNA gene sequences of almost all reference strains of *L. casei*, *L. zeae*, *L. paracasei*, and *L. rhamnosus* were obtained directly from the GenBank database according to the GenBank/ENA/DDBJ accession numbers. Sequences were aligned by ClustalW [6]. Phylogenetic trees were reconstructed using the neighbour-joining method (with the Kimura 2-parameter method) [7,8]. The bootstrap analysis was performed based on 1000 replicates [9]. The MEGA 6 package was used for all phylogenetic analyses [10].

All trees were visualized using the interactive tree of life (iTOL) v5.2 [11]. All amplification reactions were performed with a T100<sup>TM</sup> thermal cycler.

### 1.2 *Prt* proteins database construction and alignment

The Constraint-Based Alignment Tool method (Cobalt) was used with the default settings [12] to align a non-redundant database of 44 *Prt* proteins annotated in *L. casei* genomes. The Cobalt tool anchors the alignment using constraints derived from the conserved domain database (CDD) and PROSITE protein-motif database so that conserved residues of *Prt* proteins were accurately aligned. *Prt* database and cobalt output were reported in Supplementary Table S2 and Figure S2, respectively.

Proteins alignments were carried out with Clustal Omega online tool (<https://www.ebi.ac.uk/Tools/msa/clustalo/>) and visualized with Jalview [13].

**Table S2.** Dataset containing *L. casei* genomes accession numbers, putative *prt* genes coordinates (in brackets), and protein IDs.

| Strain      | <i>prtP1</i>                                         | <i>prtP2</i>                                          | <i>prtR1</i>                                           | <i>prtR2</i>                                         | <i>prtR3</i>                                         |
|-------------|------------------------------------------------------|-------------------------------------------------------|--------------------------------------------------------|------------------------------------------------------|------------------------------------------------------|
| ATCC 393    | AZCO01000003.1 (75198..80906);<br>KRK17784.1         | AP012544.1 (2174096..2179978);<br>BAN75201.1          |                                                        | AZCO01000017.1:<br>(14519..20047); KRK16171.1        |                                                      |
| LC5         |                                                      | NZ_CP017065.1 (2282143-2288025);<br>WP_087912642.1    | NZ_CP017065.1<br>(2903816..2908414);<br>WP_087913039.1 |                                                      |                                                      |
| MGB0470     |                                                      | CP064303.1 (1449026..1454908);<br>QPC17339.1          |                                                        |                                                      |                                                      |
| 12A         | NZ_CP006690.1 (2245339..2239631);<br>WP_003567119.1  |                                                       |                                                        | NZ_CP006690.1<br>(c522337..516908); WP_003563493.1   |                                                      |
| N87         |                                                      |                                                       | LCUN01000013.1<br>(514473..519071); KLI75633.1         |                                                      |                                                      |
| BIO5773     |                                                      | NZ_WBOC01000001.1<br>(403476..409358); WP_087912642.1 | NZ_WBOC01000004.1<br>(8424..13022); WP_087913039.1     |                                                      |                                                      |
| L.cR4       |                                                      | JAAQWB010000001.1<br>(110060..115942); NIG81911.1     |                                                        |                                                      |                                                      |
| CRF28       | JDWL01000024.1 (4256..9964);<br>NMN66511.1           |                                                       |                                                        | JDWL01000006.1 (19052..24481);<br>NMN65089.1         | JDWL01000006.1 (25023..31721);<br>NMN65090.1         |
| GCRL 163    | NZ_MODT01000052.1<br>(29810..35518); WP_084413663.1  |                                                       |                                                        |                                                      | NZ_MODT01000038.1 (700..7398);<br>WP_084413601.1     |
| MJA 12      | NZ_MODT01000052.1<br>(29810..35518); ORI25526.1      |                                                       |                                                        | MODS01000094.1 (31287..36716);<br>ORI23035.1         | MODS01000094.1 (37259..43957);<br>ORI23036.1         |
| NBRC 101979 | NZ_BJUH01000044.1 (c12147..6439);<br>GEK40808.1      |                                                       |                                                        | NZ_BJUH01000007.1<br>(88181..93601); WP_186808032.1  | NZ_BJUH01000007.1 (80920..87639);<br>WP_154962277.1  |
| FAM 20446   |                                                      | NZ_VBSQ01000038.1 (5827..11709);<br>WP_138426799.1    |                                                        |                                                      |                                                      |
| 867_LCAS    |                                                      | NZ_JUPZ01000131.1 (30281..36148);<br>WP_049171665.1   | NZ_JUPZ01000031.1<br>(3419..8002); WP_049169329.1      |                                                      |                                                      |
| UW4         | NZ_AFYS01000067.1<br>(c77544..71836); WP_003603181.1 |                                                       |                                                        | NZ_AFYS01000027.1<br>(c25696..20267), WP_003601280.1 | NZ_AFYS01000027.1 (c19725..13285);<br>WP_003601277.1 |
| A2-362      | NZ_AFYM01000071.1 (c7387..1679);<br>WP_003580674.1   |                                                       |                                                        | NZ_AZOE01000027.1<br>(20156..25780); WP_027111531.1  | NZ_AFYM01000018.1 (c29384..22665);<br>WP_003577862.1 |

|                   |                                                     |                                                   |                                                  |                                              |                                                     |
|-------------------|-----------------------------------------------------|---------------------------------------------------|--------------------------------------------------|----------------------------------------------|-----------------------------------------------------|
| <b>YNF-5</b>      |                                                     | SDJZ01000009.1 (60156..66038);<br>RXS57989.1      |                                                  |                                              |                                                     |
| <b>BCRC 80156</b> |                                                     | VBWM01000009.1 (10305..16187);<br>TLF36687.1      |                                                  |                                              |                                                     |
| <b>BCRC 17487</b> |                                                     | VBWL01000009.1 (10305..16187);<br>TLF35258.1      |                                                  |                                              |                                                     |
| <b>UBL-42</b>     |                                                     | JADPYW010000009.1 (10151..16033);<br>MBI6597216.1 |                                                  |                                              |                                                     |
| <b>Z11</b>        | MPOP01000032.1 (1418..7126);<br>OJF73894.1          |                                                   |                                                  | MPOP01000044.1; (491..5920);<br>OJF73652.1   | MPOP01000044.1 (6462..12977);<br>OJF73653.1         |
| <b>UW1</b>        | NZ_JDWK01000063.1 (c12240..6532);<br>WP_003585464.1 |                                                   |                                                  | JDWK01000013.1 (18949..24378);<br>NMN61755.1 | NZ_JDWK01000013.1 (24920..31618);<br>WP_003583360.1 |
| <b>B900021</b>    |                                                     |                                                   | NZ_LOJN01000127.1 (679..5253);<br>WP_075761197.1 |                                              |                                                     |
| <b>21/1</b>       | AFYK01000040.1 (c11351..5643);<br>EKQ00566.1        |                                                   |                                                  |                                              |                                                     |

---

### *1.3 Primer design*

Primers were designed with Primer 3 and listed in Table S3.

**Table S3.** Primer sequences, their targets, and the annealing temperatures used for *L. casei prtP* and *prtR* gene screening and sequencing.  
Abbreviation: na, not applicable.

| Gene        | Primer       | Sequence (5'->3')       | T <sub>m</sub><br>( °C) | Primer position | Description                                                                                     | Reference sequence (coordinates)     | Expected length<br>(bp) |
|-------------|--------------|-------------------------|-------------------------|-----------------|-------------------------------------------------------------------------------------------------|--------------------------------------|-------------------------|
| <i>PrtP</i> | cas_PrtP1_F1 | GGTGCTAACGGGACAGGTGA    |                         | 868-888         | specific for <i>prtP1</i> paralogous gene; used for PCR screening                               | NZ_CP006690.1<br>(2245339..2239631)  | 1,685                   |
|             | cas_PrtP1_R1 | CCACCAGCAGGACTATAAGTGAT |                         | 2530-2553       |                                                                                                 |                                      |                         |
|             | cas_PrtP2_F1 | CCGATACAACAAGCGCCGTC    |                         | 164-184         | specific for <i>prtP2</i> paralogous gene; used for PCR screening and amplicon sequencing       | NZ_CP017065.1<br>(2282143..2288025)  | 2,630                   |
|             | cas_PrtP2_R1 | CTGATTGGTCGAGCTGCTAAGC  |                         | 2772-2794       |                                                                                                 |                                      |                         |
|             | cas_PrtPT_F  | AAGCATGGCCGGTATTTTAC    |                         | 739-759         | common primers designed on conserved regions                                                    | NZ_CP017065.1<br>(82282143..2288025) | 1,673                   |
|             | cas_PrtPT_R  | ACAAATTGCTGTTGGTCAAAAGA |                         | 2389-2412       |                                                                                                 |                                      |                         |
|             | cas_PrtP2_F2 | CGGATGTCTGAACAATTTACCA  |                         | na              | specific for <i>prtP2</i> paralogous gene; used for as internal primer for PCR amplicon walking | NZ_CP017065.1<br>(2282143..2288025)  | na                      |
|             | cas_PrtP2_R2 | CGAGACGATGACGTTGTTGTA   |                         |                 |                                                                                                 |                                      |                         |
| <i>PrtR</i> | cas_PrtR1_F1 | GGATTCCCAGATGGACGGCTTT  |                         | 1326-1348       | specific for <i>prtR1</i> paralogous gene; used for PCR screening and amplicon sequencing       | NZ_CP017065.1<br>(2903816..2908414)  | 1,723                   |
|             | cas_PrtR1_R1 | GTCGGAAACCGCTTGAACGAAG  |                         | 3027-3049       |                                                                                                 |                                      |                         |
|             | cas_PrtR1_F2 | CGCAAACATATGCCGTCGAGTC  |                         | na              |                                                                                                 |                                      | na                      |

|              |                          |           |                                                                                                 |                                     |       |
|--------------|--------------------------|-----------|-------------------------------------------------------------------------------------------------|-------------------------------------|-------|
| cas_PrtR1_R2 | GTCTTGATAGCTTAGGCCGGTT   |           | specific for <i>priP2</i> paralogous gene; used for as internal primer for PCR amplicon walking | NZ_CP017065.1<br>(2903816..2908414) |       |
| cas_PrtR2_F  | ATCAGCGGCCAATCAAGTCGAAG  | 297-320   | specific for <i>priR2</i> paralogous gene; used for PCR screening                               | NZ_BJUH01000007.1<br>(88181..93601) | 1,397 |
| cas_PrtR2_R  | TGATAGTAAACGTTGGTGCTGCCT | 1670-1694 |                                                                                                 |                                     |       |

## 2. Supplementary Results

### 2.1 Species confirmation

Closely related species such as *L. casei*, *L. paracasei*, and *L. rhamnosus* can be difficult to discriminate by conventional 16S rRNA gene-based barcoding methods. Strains PRA205 and 2006 were isolated from two different Parmigiano Reggiano cheeses during distinct isolation projects in 2011 and 2018, respectively. Strain PRA205 was attributed to *L. casei* species based on 16S-ARDRA [14], species-specific PCR [15] and 16S rRNA gene sequencing [4]. Strain 2006 was initially attributed to *L. rhamnosus* based on *tuf* gene-targeted PCR assay [16] and 16S rRNA gene sequencing. Before beginning Prt-encoding gene and protein characterization, we confirmed species attribution of the candidate strains by *mutL* gene targeted multiplex PCR. This method was recently proven to overcome *tuf* gene-targeted PCR and 16S rRNA gene-based barcoding methods to discriminate closely related species of the *L. casei* group [1]. Phylogenetic analysis of *mutL* nucleotide sequences available in GenBank showed that *L. casei* diverges in *mutL* sequences from *L. zeae* (Supplementary Figure S1). In 2020 *L. zeae* was restored as distinct species from *L. casei* [17]. Supplementary Figure S2 showed that, like PRA205, also strain 2006 belongs to *L. casei*.

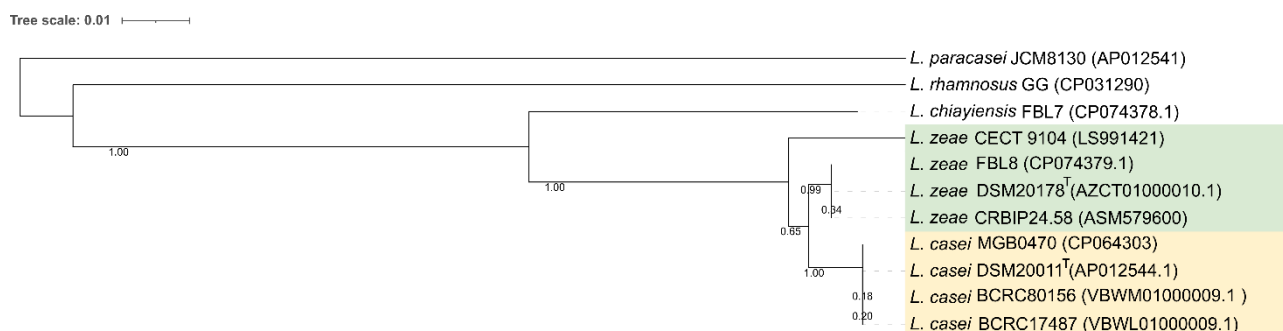

**Figure S1.** Phylogenetic relationships among *Lactocaseibacillus casei* species inferred by neighbor joining (NJ) method from *mutL* gene partial sequences. The GenBank accession numbers were reported in the brackets. The evolutionary distances were computed using the Kimura 2-parameter method and are in the units of the number of base substitutions per site. The rate variation among sites was modeled with a gamma distribution. Branch lengths are proportional to the numbers of nucleotide substitutions and are measured by the scale bar of sequence divergence. Bootstrap values are reported near to the branch.

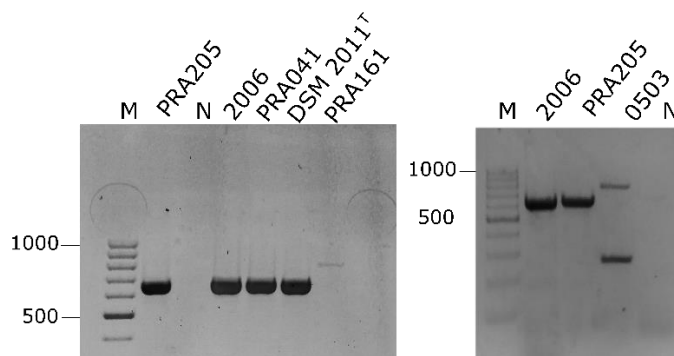

**Figure S2.** *mutL*-targeted PCR amplification of *L. casei* 2006 and PRA205. *Lactocaseibacillus casei* PRA041 and DSM 2011<sup>T</sup> were used as positive controls, while *L. rhamnosus* PRA161 and 0503 as negative controls. Band sizes are in bp. Abbreviations: M, GeneRuler 100 bp DNA Ladders (Thermo Scientific, Waltham, USA); N, PCR mixture without any DNA templates.



Resequencing of 16S rRNA gene with internal primer WLAB2 allowed a proper coverage of V1-V2 regions and confirmed that strain 2006 does not belong to *L. rhamnosus* but formed a monophyletic group with *L. casei* ATCC 393<sup>T</sup> (= DMS 20011<sup>T</sup>) strictly related to *L. zeae* ATCC15820<sup>T</sup> (Supplementary Figure S3).

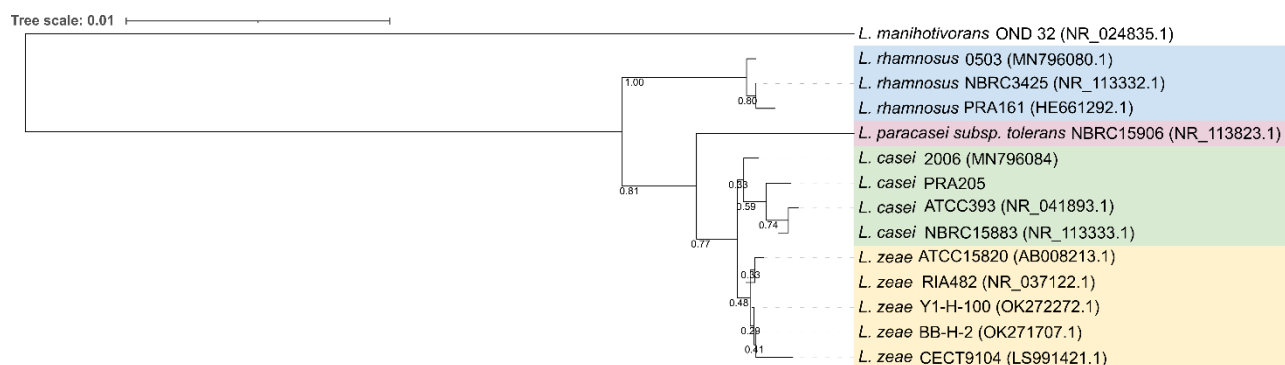

**Figure S3. Phylogenetic tree generated from 1473 nucleotide positions of the strain 2006 16S rRNA gene.** The tree was constructed using the Neighbor-joining method. The evolutionary distances were computed using the Kimura 2-parameter method and are in the units of the number of base substitutions per site. Bootstrap values (1000 replicates) of > 0.5 are indicated at the branching points, and GenBank accession numbers are shown in parentheses. The scale bar indicates a distance equivalent of one nucleotide change per 100 nucleotides.

## 2.2 Prt Domain identification and protein alignments

Figure S4 reported the summary of protein domains in PrtP1, PrtP2, PrtR1, PrtR2, and PrtR3 as revealed by Domain identification with Conserved Domains Database (CDD).

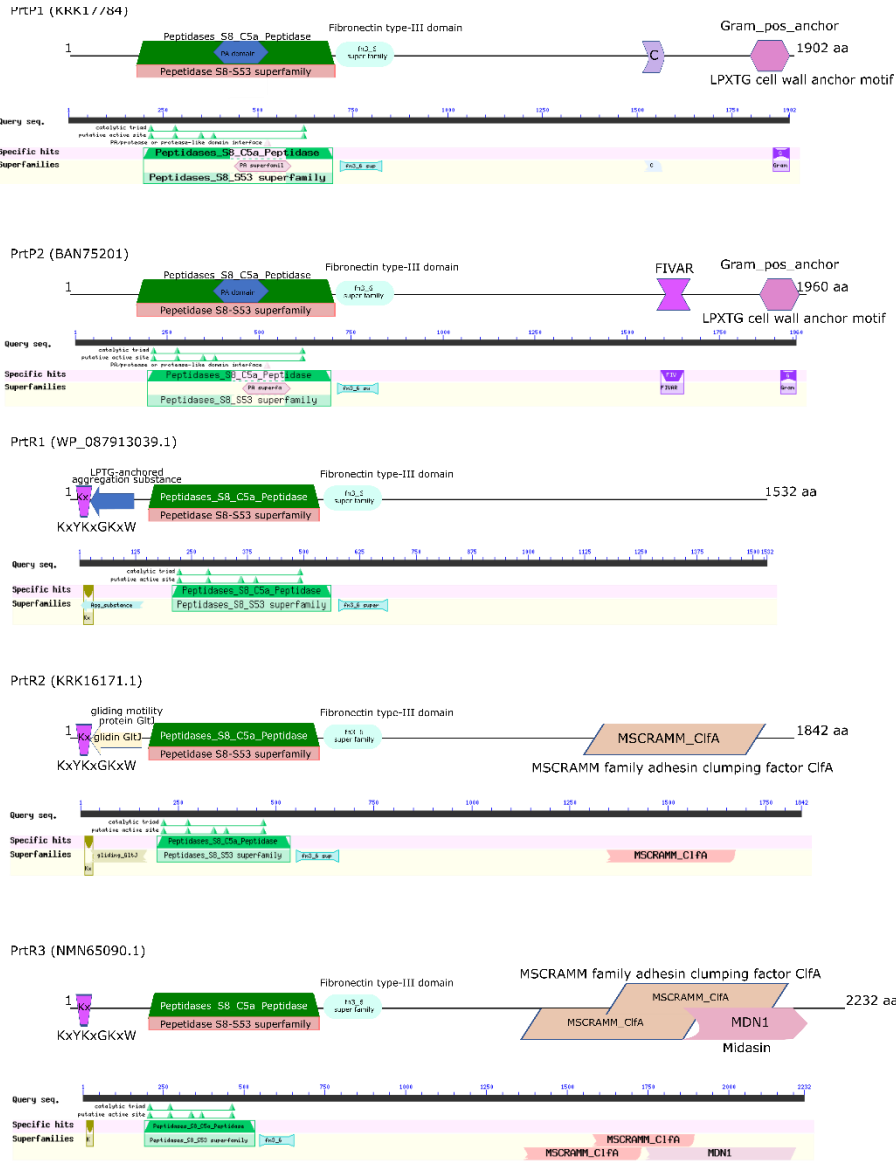

**Figure S4.** Representative selection of conserved domains identified in PrtP1, PrtP2, PrtR1, PrtR2, and PrtR3. Search for conserved domain was carried out with NCBI Batch Web Conserved Domain tool.

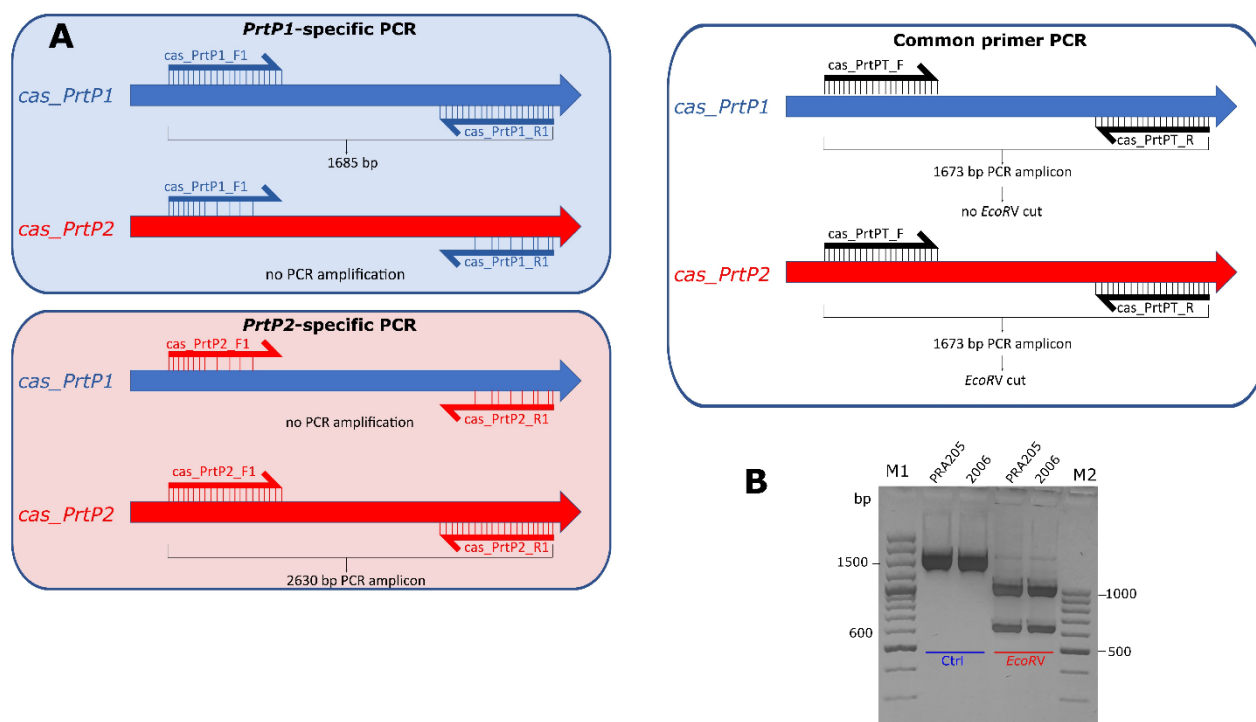

**Figure S5.** PCR-based approaches to dissect *PrtP* variants in *Lactocaseibacillus casei* PRA205 and 2006. **A.** Schematic drawing of PCR strategies with *PrtP* variant-specific and common primers. Primer sequences were detailed in Table S3. **B** Restriction pattern of *prtP* gene PCR amplicons obtained with the conserved primers cas\_PrtPT\_F/cas\_PrtPT\_R. Primer pair was designed to amplify *prtP1* and *prtP2* genes, resulting in a PCR amplicon of app. 1,673 bp for both the target genes. Diagnostic endonuclease *EcoRV* was chosen to selectively cut *prtP2* paralogous gene resulting in two fragments of app. 1041 and 630 bp, respectively. M1 and M2 are GeneRuler 100 bp Plus DNA Ladders and GeneRuler 100 bp DNA Ladders (Thermo Scientific, Waltham, USA)

Polymorphic sites in Prt amino acid sequences of strain PRa205 and 2006 were reported in Figures S6 and S7.

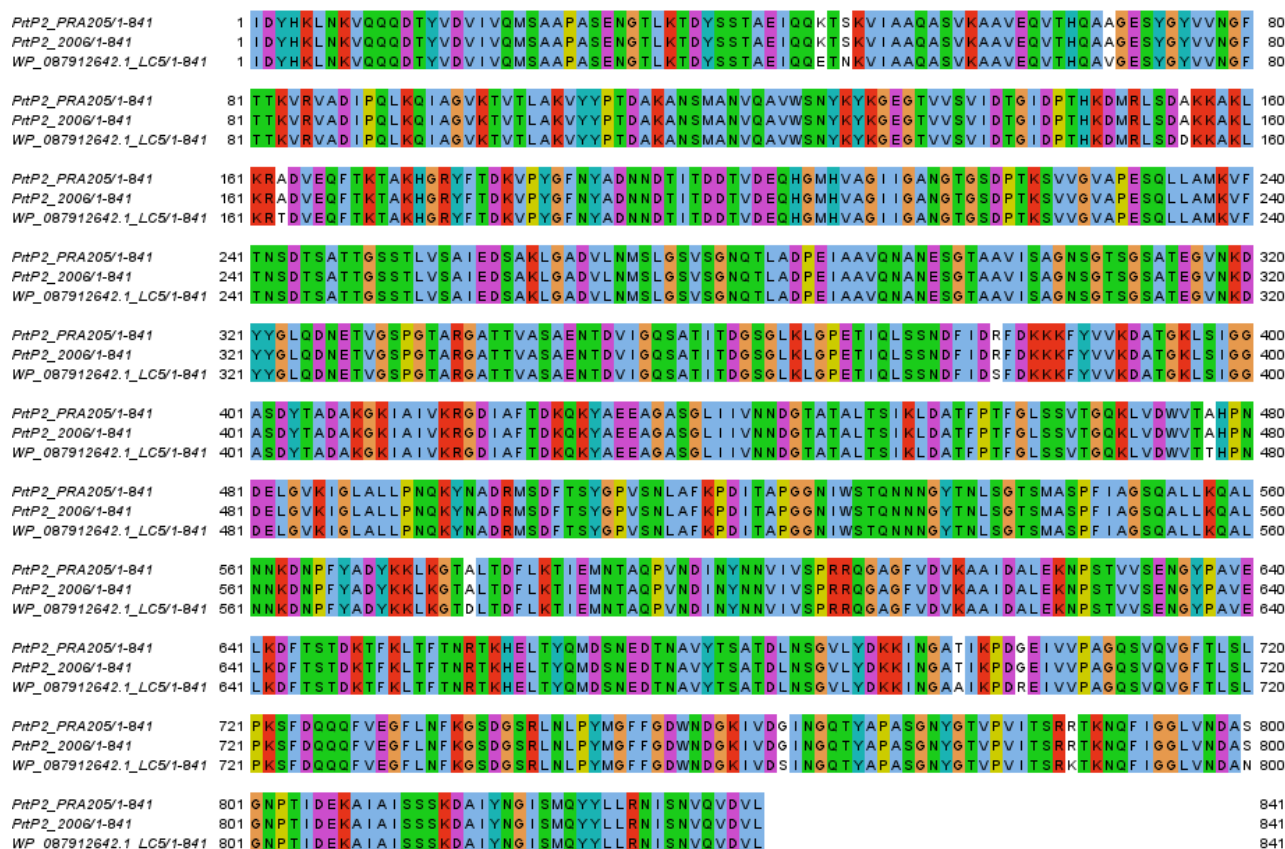

**Figure S6.** Multiple sequence alignment of PRA205 and 2006 PrtP2 partial proteins with PrtP2 reference protein from *Lactocaseibacillus casei* LC5. Alignment was done using Clustal Omega server and visualized using Jalview. The amino acid identities were coloured according to Clustal Omega color scheme.

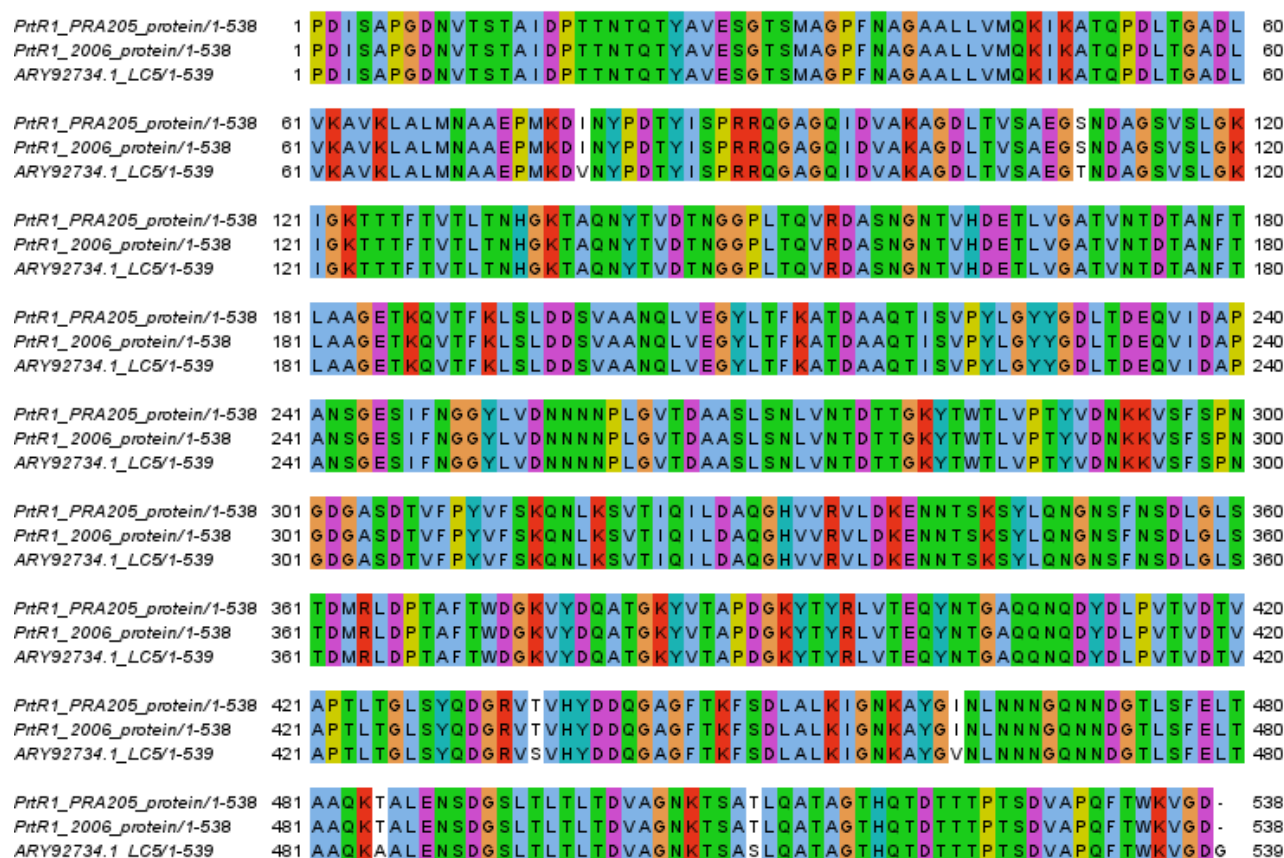

**Figure S7.** Multiple sequence alignment of PRA205 and 2006 PrtR1 partial proteins with PrtR1 reference protein from *Lactiacaseibacillus casei* LC5. Alignment was done using Clustal Omega server and visualized using Jalview. The amino acid identities were coloured according to Clustal Omega color scheme.

### 2.3 Peptide releases

Number of peptides identified in  $\beta$ -casein and  $\alpha$ S1-casein hydrolysates obtained PRA205 and 2006 PrtR1 proteinases were reported in Supplementary Figure S6, while differences between PRA205 and 2006 in peptide profiles were drawn as Venn diagrams (Supplementary Figure S7). Tables S3, S4, S5, and S6 listed all the peptides found in different hydrolysates by mass spectrometry.

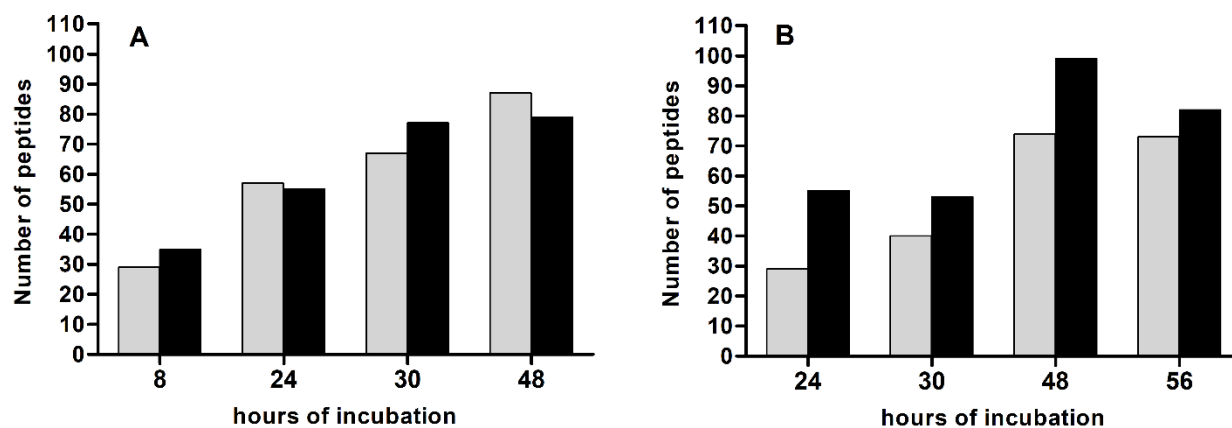

**Figure S8.** Number of peptides identified in  $\beta$ -casein and  $\alpha$ S1-casein hydrolysates at the different time points. (A) Number of peptides identified in  $\beta$ -casein hydrolysates at 8, 24, 30 and 48 h of incubation. (B) Number of peptides identified in  $\alpha$ S1-casein hydrolysates at 24, 30, 48 and 56 h of incubation. Grey columns identified the number of peptides released by *Lactocaseibacillus casei* PRA205 PrtR1 hydrolysis. Black columns identified the number of peptides released by *Lactocaseibacillus casei* 2006 PrtR1 hydrolysis.

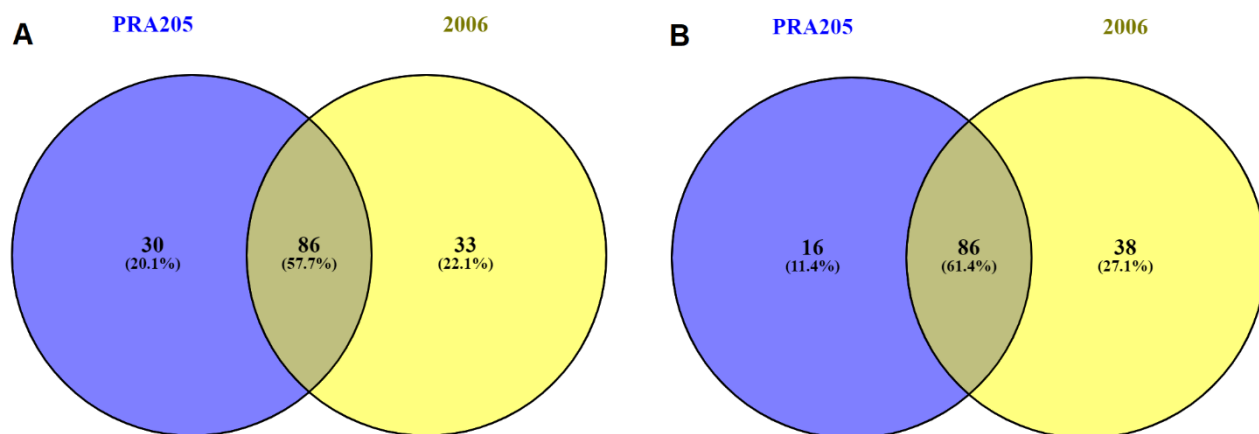

**Figure S9.** Venn diagram displaying differences between peptides produced after  $\beta$ -casein (A) or  $\alpha$ S1-casein (B) hydrolysis by *Lactocaseibacillus casei* PRA205 and 2006. Venn diagrams were drawn using the online tool VENNY 2.1.0 by considering the peptides detected after 48 h and 56 h of  $\beta$ -casein and  $\alpha$ S1-casein hydrolysis, respectively. See online Supplementary Material Table S4-S7 for the peptide sequences.

**Table S4.** List of peptides identified at the different time points during hydrolysis of  $\beta$ -casein with PrtR1 from *Lacticaseibacillus casei* PRA205

| Fragment | Sequence                                                | Observed mass $[M+H]^+$ | Error (ppm) | 8h | 24h | 30h | 48h |
|----------|---------------------------------------------------------|-------------------------|-------------|----|-----|-----|-----|
| 1 – 7    | RELEELN                                                 | 451.7334                | 1.93        | -  | +   | +   | +   |
| 1 – 31   | RELEELNVPGEIVESLSSEESITRINKKIE                          | 962.6848                | 2.15        | -  | -   | -   | +   |
| 1 – 56   | RELEELNVPGEIVESLSSEESITRINKKIEKFQSEEQQQTEDELQDKIHPFAQTQ | 1389.0224               | 0.29        | -  | -   | -   | +   |
| 32 – 46  | KFQSEEQQQTEDELQ                                         | 973.9047                | 0.32        | -  | -   | -   | +   |
| 32 – 52  | KFQSEEQQQTEDELQDKIHPF                                   | 895.4003                | -0.45       | -  | -   | -   | +   |
| 32 – 56  | KFQSEEQQQTEDELQDKIHPFAQTQ                               | 1038.1321               | -2.46       | -  | -   | -   | +   |
| 43 – 56  | DELQDKIHPFAQTQ                                          | 835.4127                | 0.01        | -  | +   | +   | +   |
| 43 – 68  | DELQDKIHPFAQTQSLVYPFGPIPN                               | 984.5037                | 0.96        | -  | -   | -   | +   |
| 43 – 72  | DELQDKIHPFAQTQSLVYPFGPIPNSLPQ                           | 844.9363                | 0.64        | -  | -   | +   | -   |
| 47 – 57  | DKIHPFAQTQS                                             | 636.3217                | -1.45       | -  | -   | -   | +   |
| 47 – 68  | DKIHPFAQTQSLVYPFGPIPN                                   | 822.7647                | -0.78       | -  | +   | +   | -   |
| 47 – 72  | DKIHPFAQTQSLVYPFGPIPNSLPQ                               | 964.5112                | 3.46        | -  | +   | +   | +   |
| 57 – 68  | SLVYPFGPIPN                                             | 650.8511                | 0.99        | -  | -   | -   | +   |
| 65 – 67  | PIP                                                     | 326.2079                | 1.45        | -  | -   | -   | +   |
| 73 – 105 | NIPPLTQTPVVPPFLQPEVMGVSKVKEAMAPK                        | 886.2464                | 3.14        | +  | -   | -   | -   |
| 73 – 99  | NIPPLTQTPVVPPFLQPEVMGVSKVK                              | 729.4183                | 1.35        | -  | +   | -   | -   |
| 74 – 77  | IPPL                                                    | 439.2916                | 0.23        | -  | -   | -   | +   |
| 83 – 86  | VVPP                                                    | 411.2609                | 1.59        | -  | -   | -   | +   |
| 83 – 97  | VVPPFLQPEVMGVSK                                         | 813.9525                | 3.28        | -  | -   | -   | +   |
| 92 – 97  | VMGVSK                                                  | 310.6759                | 1.38        | -  | +   | +   | +   |
| 94 – 105 | GVSKVKEAMAPK                                            | 415.5733                | 1.79        | -  | +   | -   | -   |
| 97 – 105 | KVKEAMAPK                                               | 334.5323                | 1.19        | -  | -   | -   | +   |
| 97 – 99  | KVK                                                     | 374.2765                | 0.77        | -  | -   | +   | +   |



|           |                                                          |           |       |   |   |   |   |
|-----------|----------------------------------------------------------|-----------|-------|---|---|---|---|
| 100 – 128 | EAMAPKHKEMPFPKYPVEPFOTESQSLTLT                           | 834.1695  | 0.88  | - | - | - | + |
| 100 – 132 | EAMAPKHKEMPFPKYPVEPFOTESQSLTLTDVEN                       | 758.9746  | 2.59  | - | - | - | + |
| 100 – 139 | EAMAPKHKEMPFPKYPVEPFOTESQSLTLTDVENLHLPLPL                | 763.2293  | 1.02  | - | + | - | - |
| 103 – 105 | APK                                                      | 315.2029  | 0.74  | - | - | - | + |
| 103 – 124 | APKHKEMPFPKYPVEPFOTESQS                                  | 515.6606  | 1.55  | - | - | - | + |
| 103 – 128 | APKHKEMPFPKYPVEPFOTESQSLTLT                              | 751.3892  | 0.55  | - | - | - | + |
| 103 – 139 | APKHKEMPFPKYPVEPFOTESQSLTLTDVENLHLPLPL                   | 849.4486  | -0.18 | - | - | - | + |
| 103 – 144 | APKHKEMPFPKYPVEPFOTESQSLTLTDVENLHLPLPLQLSWM              | 815.5909  | -0.06 | - | - | - | + |
| 106 – 133 | HKEMPFPKYPVEPFOTESQSLTLTDVENL                            | 819.9094  | 0.80  | - | - | - | + |
| 106 – 160 | HKEMPFPKYPVEPFOTESQSLTLTDVENLHLPLPLQLSWMHQPHQPLPPTVMFPPQ | 1071.5456 | -1.02 | - | - | - | + |
| 128 – 139 | TDVENLHLPLPL                                             | 680.8792  | 2.91  | - | + | + | + |
| 129 – 139 | DVENLHLPLPL                                              | 630.3530  | -0.56 | - | + | + | + |
| 129 – 141 | DVENLHLPLPLQL                                            | 750.9230  | -2.23 | - | - | - | + |
| 129 – 143 | DVENLHLPLPLQLSW                                          | 887.4808  | 0.53  | - | + | + | - |
| 129 – 144 | DVENLHLPLPLQLSWM                                         | 952.9975  | -3.24 | - | - | - | + |
| 133 – 142 | LHLPLPLQLS                                               | 565.8499  | -0.62 | - | - | - | + |
| 134 – 142 | HLPLPLQLS                                                | 509.3089  | 1.30  | - | - | - | + |
| 135 – 141 | LPLPLQL                                                  | 397.2625  | -0.56 | + | + | + | + |
| 135 – 142 | LPLPLQLS                                                 | 440.7797  | 2.25  | + | + | + | + |
| 144 – 156 | MHQPHQPLPPTVM                                            | 756.8766  | 0.67  | - | - | + | + |
| 144 – 160 | MHQPHQPLPPTVMFPPQ                                        | 661.3313  | 0.95  | - | - | - | + |
| 144 – 175 | MHQPHQPLPPTVMFPPQSVLSLSQSKVLPVPQ                         | 886.9745  | -1.25 | - | - | + | - |
| 145 – 163 | HQPHQPLPPTVMFPPQSVL                                      | 717.3814  | 3.72  | - | - | - | + |
| 151 – 154 | LPPT                                                     | 427.2559  | 1.77  | - | + | + | + |
| 161 – 175 | SVLSLSQSKVLPVPQ                                          | 791.4668  | 3.31  | + | + | + | + |
| 161 – 176 | SVLSLSQSKVLPVPQK                                         | 570.6795  | 4.63  | + | + | + | - |
| 161 – 182 | SVLSLSQSKVLPVPQKAVPYPQ                                   | 789.1205  | -0.91 | + | + | - | - |
| 161 – 183 | SVLSLSQSKVLPVPQKAVPYPQR                                  | 631.1177  | -0.44 | - | + | + | - |

|           |                                                   |           |       |   |   |   |   |
|-----------|---------------------------------------------------|-----------|-------|---|---|---|---|
| 161 – 209 | SVLSLSQSKVLPVPQKAVPYPQRDMPIQAFLLYQEPVLGPVRGPFPIIV | 1083.2121 | -0.16 | - | - | + | - |
| 162 – 169 | VLSLSQSK                                          | 431.2556  | -0.12 | - | - | + | - |
| 162 – 175 | VLSLSQSKVLPVPQ                                    | 747.9492  | 1.36  | - | + | + | - |
| 164 – 175 | SLSQSKVLPVPQ                                      | 641.8738  | 3.02  | + | + | + | + |
| 164 – 176 | SLSQSKVLPVPQK                                     | 705.9193  | -0.06 | - | + | + | + |
| 164 – 182 | SLSQSKVLPVPQKAVPYPQ                               | 689.3938  | 1.14  | + | + | + | + |
| 164 – 183 | SLSQSKVLPVPQKAVPYPQR                              | 741.4272  | 0.62  | - | + | + | + |
| 164 – 186 | SLSQSKVLPVPQKAVPYPQRDMP                           | 642.1022  | 0.43  | - | + | + | - |
| 164 – 189 | SLSQSKVLPVPQKAVPYPQRDMPIQA                        | 959.8590  | -1.07 | - | - | - | + |
| 164 – 190 | SLSQSKVLPVPQKAVPYPQRDMPIQAF                       | 1008.8814 | -1.42 | - | - | - | + |
| 165 – 175 | LSQSKVLPVPQ                                       | 598.3567  | 1.42  | - | - | + | - |
| 166 – 175 | SQSKVLPVPQ                                        | 541.8160  | 3.90  | + | + | + | + |
| 166 – 176 | SQSKVLPVPQK                                       | 404.2440  | 1.79  | - | - | - | + |
| 166 – 182 | SQSKVLPVPQKAVPYPQ                                 | 622.6876  | -0.11 | - | + | + | + |
| 166 – 183 | SQSKVLPVPQKAVPYPQR                                | 506.2944  | 3.07  | - | + | + | + |
| 167 – 183 | QSKVLPVPQKAVPYPQR                                 | 645.7118  | 1.74  | - | + | + | + |
| 168 – 183 | SKVLPVPQKAVPYPQR                                  | 452.5211  | 2.00  | - | - | - | + |
| 169 – 183 | KVLPVPQKAVPYPQR                                   | 430.7622  | 0.12  | - | - | - | + |
| 170 – 182 | VLPVPQKAVPYPQ                                     | 718.4202  | 1.69  | - | + | + | + |
| 170 – 183 | VLPVPQKAVPYPQR                                    | 531.3147  | -1.54 | - | - | + | + |
| 170 – 184 | VLPVPQKAVPYPQRD                                   | 569.6589  | 2.01  | + | + | + | + |
| 170 – 186 | VLPVPQKAVPYPQRDMP                                 | 645.6893  | 0.72  | - | + | + | + |
| 170 – 209 | VLPVPQKAVPYPQRDMPIQAFLLYQEPVLGPVRGPFPIIV          | 1121.3834 | -0.46 | + | - | - | - |
| 171 – 175 | LPVPQ                                             | 553.3359  | 2.60  | - | + | + | + |
| 171 – 182 | LPVPQKAVPYPQ                                      | 668.8831  | -2.57 | - | + | + | + |
| 171 – 186 | LPVPQKAVPYPQRDMP                                  | 612.6667  | 1.10  | - | - | - | + |
| 172 – 175 | PVPQ                                              | 440.2500  | -0.77 | - | - | + | - |
| 173 – 175 | VPQ                                               | 343.1980  | 1.13  | - | + | - | - |

|           |                                   |           |       |   |   |   |   |
|-----------|-----------------------------------|-----------|-------|---|---|---|---|
| 176 – 190 | KAVYPQRDMPIQAF                    | 880.9605  | -0.89 | - | - | - | + |
| 176 – 192 | KAVYPQRDMPIQAFLL                  | 663.0324  | -0.40 | - | - | - | + |
| 176 – 209 | KAVYPQRDMPIQAFLLYQEPVLGPVRGPFPIIV | 1283.7138 | -0.53 | - | - | + | - |
| 177 – 186 | AVYPQRDMP                         | 587.2907  | 1.75  | - | - | + | + |
| 177 – 188 | AVYPQRDMPIQ                       | 707.8593  | -2.35 | - | - | + | - |
| 178 – 186 | VPYPQRDMP                         | 551.7717  | 1.07  | - | - | + | + |
| 178 – 190 | VPYPQRDMPIQAF                     | 781.3959  | 0.90  | + | + | + | + |
| 179 – 182 | PYPQ                              | 504.2455  | 0.37  | - | - | - | + |
| 180 – 188 | YPQRDMPIQ                         | 574.2842  | 4.10  | - | + | + | + |
| 180 – 190 | YPQRDMPIQAF                       | 683.3351  | 0.64  | - | + | + | - |
| 183 – 190 | RDMPIQAF                          | 489.2485  | 2.56  | + | + | + | + |
| 183 – 191 | RDMPIQAFL                         | 545.7910  | 3.14  | - | + | + | - |
| 183 – 192 | RDMPIQAFL                         | 602.3327  | 2.33  | - | + | + | - |
| 183 – 193 | RDMPIQAFLLY                       | 683.8636  | 0.84  | + | + | + | - |
| 183 – 209 | RDMPIQAFLLYQEPVLGPVRGPFPIIV       | 1022.5753 | 3.39  | + | + | + | + |
| 184 – 209 | DMPIQAFLLYQEPVLGPVRGPFPIIV        | 1455.3094 | 4.02  | - | - | - | + |
| 186 – 188 | PIQ                               | 357.2137  | 1.32  | + | + | + | - |
| 190 – 206 | FLLYQEPVLGPVRGPF                  | 965.0331  | -2.22 | + | - | - | - |
| 191 – 193 | LLY                               | 408.2500  | 1.68  | + | + | + | + |
| 191 – 202 | LLYQEPVLGPVR                      | 692.4046  | 1.80  | + | + | + | + |
| 191 – 206 | LLYQEPVLGPVRGPF                   | 891.5011  | 0.02  | + | + | + | + |
| 191 – 209 | LLYQEPVLGPVRGPFPIIV               | 1054.1198 | 0.48  | + | + | + | + |
| 192 – 202 | LYQEPVLGPVR                       | 635.8622  | 1.33  | - | - | - | + |
| 192 – 204 | LYQEPVLGPVRGP                     | 712.8988  | 0.45  | - | - | - | + |
| 192 – 206 | LYQEPVLGPVRGPF                    | 834.9612  | 2.53  | + | + | + | + |
| 192 – 209 | LYQEPVLGPVRGPFPIIV                | 997.5768  | -0.50 | - | - | - | + |
| 193 – 202 | YQEPVLGPVR                        | 386.5492  | 1.44  | + | + | + | + |
| 193 – 204 | YQEPVLGPVRGP                      | 656.3574  | 1.55  | + | + | + | + |

|           |                   |           |       |   |   |   |   |
|-----------|-------------------|-----------|-------|---|---|---|---|
| 193 – 206 | YQEPVLGPVRGPFPP   | 778.4173  | 0.32  | + | + | + | + |
| 193 – 207 | YQEPVLGPVRGPFPI   | 834.9621  | 3.65  | + | + | + | + |
| 193 – 209 | YQEPVLGPVRGPFPIIV | 941.0365  | 1.27  | + | + | + | + |
| 194 – 206 | QEPVLGPVRGPFPP    | 696.8869  | 2.29  | + | + | + | + |
| 194 – 209 | QEPVLGPVRGPFPIIV  | 1717.9982 | -1.03 | - | - | + | + |
| 195 – 206 | EPVLGPVRGPFPP     | 632.8556  | -0.78 | - | + | + | + |
| 197 – 202 | VLGPVR            | 320.7100  | -2.18 | - | + | + | - |
| 199 – 206 | GPVRGPFPP         | 413.7328  | 1.55  | - | - | + | - |
| 207 – 209 | IIV               | 344.2547  | 0.84  | + | + | + | + |

**Table S5.** List of peptides identified at the different time points during hydrolysis of aS1-casein with PrtR1 from *Lactocaseibacillus casei* PRA205

| Fragment | Sequence                  | Observed mass $[M+H]^+$ | Error (ppm) | 24h | 30h | 48h | 56h |
|----------|---------------------------|-------------------------|-------------|-----|-----|-----|-----|
| 1 – 8    | RPKHPIKH                  | 338.2097                | -1.75       | -   | -   | +   | -   |
| 1 – 22   | RPKHPIKHQGLPQEVLENENLLR   | 524.1039                | 2.35        | +   | +   | +   | +   |
| 1 – 23   | RPKHPIKHQGLPQEVLENENLLRF  | 691.6447                | 1.46        | +   | +   | +   | +   |
| 1 – 24   | RPKHPIKHQGLPQEVLENENLLRFF | 582.9319                | 3.21        | -   | -   | +   | -   |
| 5 – 7    | PIK                       | 357.2497                | 0.31        | +   | +   | +   | +   |
| 8 – 16   | HQGLPQEV                  | 510.7783                | 2.04        | +   | +   | +   | +   |
| 8 – 20   | HQGLPQEVLENENL            | 745.8849                | 1.79        | +   | +   | +   | -   |
| 8 – 21   | HQGLPQEVLENENLL           | 802.4264                | 1.02        | -   | +   | +   | +   |
| 8 – 22   | HQGLPQEVLENENLLR          | 587.3198                | 0.03        | +   | +   | +   | +   |
| 8 – 23   | HQGLPQEVLENENLLRF         | 636.3413                | -2.06       | +   | +   | +   | +   |
| 10 – 22  | GLPQEVLENENLLR            | 747.9183                | 1.27        | +   | +   | +   | +   |
| 10 – 23  | GLPQEVLENENLLRF           | 547.9700                | -0.27       | -   | +   | +   | +   |
| 10 – 24  | GLPQEVLENENLLRFF          | 596.9960                | 5.07        | -   | -   | +   | +   |
| 11 – 22  | LPQEVLENENLLR             | 719.4074                | 1.13        | +   | +   | +   | +   |
| 11 – 23  | LPQEVLENENLLRF            | 528.9624                | -1.16       | -   | +   | +   | +   |
| 11 – 24  | LPQEVLENENLLRFF           | 866.4762                | 1.30        | -   | -   | +   | +   |
| 13 – 22  | QEVLENENLLR               | 614.3369                | -2.16       | -   | -   | +   | -   |
| 13 – 23  | QEVLENENLLRF              | 687.8726                | 0.22        | -   | -   | +   | +   |
| 14 – 22  | EVLNENLLR                 | 550.3093                | 0.67        | +   | +   | +   | +   |
| 14 – 23  | EVLNENLLRF                | 623.8438                | 1.07        | +   | +   | +   | +   |
| 14 – 24  | EVLNENLLRFF               | 697.3770                | -0.44       | -   | -   | +   | +   |
| 15 – 22  | VLNENLLR                  | 485.7883                | 1.47        | +   | +   | +   | +   |
| 15 – 23  | VLNENLLRF                 | 559.3222                | 0.56        | +   | +   | +   | +   |
| 16 – 18  | LNE                       | 375.1879                | 1.34        | -   | -   | +   | -   |

|          |                     |          |       |   |   |   |   |
|----------|---------------------|----------|-------|---|---|---|---|
| 16 – 22  | LNENLLR             | 436.2547 | 3.01  | + | + | + | + |
| 16 – 23  | LNENLLRF            | 509.7885 | 1.82  | + | + | + | + |
| 17 – 22  | NENLLR              | 379.7123 | 2.30  | - | - | + | - |
| 23 – 37  | FFVAPFPEVFGKEKV     | 580.9852 | 2.85  | - | - | - | + |
| 24 – 35  | FVAPFPEVFGKE        | 683.8563 | 0.77  | - | + | + | + |
| 24 – 42  | FVAPFPEVFGKEKVNELSK | 542.0482 | 3.18  | - | - | + | - |
| 25 – 34  | VAPFPEVFGK          | 545.8016 | 2.47  | - | - | + | - |
| 25 – 35  | VAPFPEVFGKE         | 610.3233 | 2.85  | - | - | - | + |
| 25 – 42  | VAPFPEVFGKEKVNELSK  | 505.2801 | 1.46  | - | - | - | + |
| 26 – 35  | APFPEVFGKE          | 560.7881 | 1.46  | + | + | - | - |
| 28 – 35  | FPEVFGKE            | 476.7431 | 1.56  | - | - | - | + |
| 55 – 57  | EDI                 | 376.1722 | 1.95  | - | + | - | - |
| 80 – 82  | HIQ                 | 397.2196 | 0.63  | - | - | + | - |
| 83 – 102 | KEDVPSEYLGYLEQLLRLK | 817.1197 | -0.08 | - | - | - | + |
| 83 – 91  | KEDVPSEY            | 374.8527 | 1.00  | - | - | - | + |
| 83 – 93  | KEDVPSEYLG          | 431.5550 | 1.90  | - | + | + | + |
| 85 – 100 | DVPSEYLGYLEQLLR     | 651.0151 | 1.27  | - | - | + | + |
| 85 – 102 | DVPSEYLGYLEQLLRLK   | 731.4075 | 0.28  | - | - | - | + |
| 87 – 102 | PSEYLGYLEQLLRLK     | 660.0419 | -0.48 | - | - | - | + |
| 91 – 100 | YLGYLEQLLR          | 634.3567 | 1.36  | - | - | - | + |
| 91 – 102 | YLGYLEQLLRLK        | 503.6329 | 0.39  | - | - | - | + |
| 92 – 100 | LGYLEQLLR           | 552.8257 | 2.63  | - | - | + | + |
| 92 – 101 | LGYLEQLLRL          | 609.3684 | 3.59  | - | - | - | + |
| 92 – 102 | LGYLEQLLRLK         | 449.2780 | -0.55 | - | - | + | + |
| 92 – 94  | LGY                 | 352.1874 | 2.03  | - | + | - | - |
| 93 – 100 | GYLEQLLR            | 496.2829 | 1.48  | - | - | + | + |
| 93 – 102 | GYLEQLLRLK          | 411.5838 | 0.60  | - | - | + | + |
| 94 – 100 | YLEQLLR             | 467.7717 | 0.58  | - | - | + | + |

|           |                              |          |       |   |   |   |   |
|-----------|------------------------------|----------|-------|---|---|---|---|
| 94 – 101  | YLEQLRL                      | 524.3140 | 1.08  | - | - | + | + |
| 94 – 102  | YLEQLRLK                     | 392.5771 | 1.79  | - | + | + | + |
| 95 – 100  | LEQLLR                       | 386.2398 | 0.18  | - | - | + | + |
| 95 – 101  | LEQLRL                       | 442.7826 | 1.77  | - | - | + | + |
| 95 – 102  | LEQLRLK                      | 506.8296 | 0.62  | - | - | + | - |
| 103 – 121 | KYKVPQLEIVPNSAEERLH          | 777.4015 | -0.24 | - | - | - | + |
| 103 – 123 | KYKVPQLEIVPNSAEERLHSM        | 637.8217 | 0.85  | - | - | + | + |
| 103 – 128 | KYKVPQLEIVPNSAEERLHSMKEGIH   | 623.3179 | -1.36 | - | - | - | + |
| 103 – 130 | KYKVPQLEIVPNSAEERLHSMKEGIHAQ | 663.1396 | 2.55  | - | + | + | + |
| 104 – 121 | YKVPQLEIVPNSAEERLH           | 551.2798 | 0.84  | - | - | + | + |
| 104 – 123 | YKVPQLEIVPNSAEERLHSM         | 605.7988 | 2.31  | - | - | + | + |
| 104 – 130 | YKVPQLEIVPNSAEERLHSMKEGIHAQ  | 796.6464 | -0.56 | - | - | + | + |
| 105 – 121 | KVPQLEIVPNSAEERLH            | 680.3490 | 0.24  | - | - | + | + |
| 105 – 123 | KVPQLEIVPNSAEERLHSM          | 753.0398 | 0.17  | - | - | - | + |
| 106 – 108 | VPQ                          | 343.1979 | 0.97  | - | - | + | - |
| 106 – 121 | VPQLEIVPNSAEERLH             | 637.6515 | 1.46  | - | - | + | + |
| 106 – 123 | VPQLEIVPNSAEERLHSM           | 710.3426 | 1.63  | - | - | + | + |
| 106 – 130 | VPQLEIVPNSAEERLHSMKEGIHAQ    | 723.8571 | -0.21 | - | - | + | + |
| 108 – 121 | QLEIVPNSAEERLH               | 572.2753 | -2.61 | - | - | - | + |
| 109 – 121 | LEIVPNSAEERLH                | 529.5927 | 3.88  | + | + | + | + |
| 109 – 123 | LEIVPNSAEERLHSM              | 602.2831 | 2.75  | + | + | + | + |
| 110 – 121 | EIVPNSAEERLH                 | 491.8969 | 1.93  | - | - | + | - |
| 110 – 123 | EIVPNSAEERLHSM               | 564.5876 | 1.43  | - | - | + | + |
| 111 – 121 | IVPNSAEERLH                  | 448.8823 | 1.31  | + | - | + | - |
| 111 – 123 | IVPNSAEERLHSM                | 521.5738 | 2.31  | + | - | - | - |
| 112 – 121 | VPNSAEERLH                   | 411.1873 | 0.61  | - | - | + | - |
| 112 – 123 | VPNSAEERLHSM                 | 725.3143 | 1.52  | + | + | + | + |
| 115 – 123 | SAEERLHSM                    | 570.2322 | 1.77  | - | - | + | - |

|           |                                |           |       |   |   |   |   |
|-----------|--------------------------------|-----------|-------|---|---|---|---|
| 115 – 130 | SAEERLHSMKEGIHAQ               | 476.4702  | 3.23  | - | - | + | - |
| 124 – 143 | KEGIHAQQKEPMIGVNQELA           | 555.7917  | 0.37  | - | - | + | - |
| 124 – 148 | KEGIHAQQKEPMIGVNQELAYFYPE      | 730.6157  | 2.27  | + | + | + | + |
| 124 – 151 | KEGIHAQQKEPMIGVNQELAYFYPELFR   | 667.9455  | 3.06  | - | + | - | - |
| 124 – 152 | KEGIHAQQKEPMIGVNQELAYFYPELFRQ  | 693.5575  | 3.37  | + | - | - | - |
| 131 – 143 | QKEPMIGVNQELA                  | 486.2540  | 0.75  | - | - | - | + |
| 131 – 151 | QKEPMIGVNQELAYFYPELFR          | 858.1047  | 3.50  | - | - | - | + |
| 131 – 152 | QKEPMIGVNQELAYFYPELFRQ         | 900.7876  | -0.32 | - | - | - | + |
| 136 – 152 | IGVNQELAYFYPELFRQ              | 696.3591  | 1.44  | - | - | - | + |
| 142 – 144 | LAY                            | 366.2028  | 1.38  | + | + | + | + |
| 146 – 152 | YPELFRQ                        | 476.7487  | 1.56  | + | + | + | + |
| 147 – 149 | PEL                            | 358.1974  | 0.51  | - | - | + | + |
| 166 – 168 | YVP                            | 378.2027  | 0.84  | - | - | + | - |
| 170 – 194 | GTQYTDAPSFSDIPNPIGSENSEKT      | 885.7394  | -0.80 | - | - | - | + |
| 170 – 199 | GTQYTDAPSFSDIPNPIGSENSEKTTMPLW | 1095.1737 | -1.07 | - | + | + | + |
| 173 – 194 | YTDAPSFSDIPNPIGSENSEKT         | 790.3646  | 0.54  | - | + | - | - |
| 175 – 194 | DAPSFSDIPNPIGSENSEKT           | 702.3269  | -0.42 | - | + | - | - |
| 179 – 194 | FSDIPNPIGSENSEKT               | 867.9116  | -1.18 | + | + | + | - |
| 179 – 199 | FSDIPNPIGSENSEKTTMPLW          | 1182.0637 | -0.94 | + | + | + | - |
| 181 – 194 | DIPNPIGSENSEKT                 | 750.8633  | 1.11  | + | + | + | + |
| 181 – 199 | DIPNPIGSENSEKTTMPLW            | 1065.0123 | -2.12 | + | + | + | - |
| 197 – 199 | PLW                            | 415.2335  | -1.22 | - | + | + | + |



**Table S6.** List of peptides identified at the different time points during hydrolysis of  $\beta$ -casein with PrtR1 from *Lactocaseibacillus casei* 2006

| Fragment | Sequence                                                 | Observed mass $[M+H]^+$ | Error (ppm) | 8h | 24h | 30h | 48h |
|----------|----------------------------------------------------------|-------------------------|-------------|----|-----|-----|-----|
| 1 – 7    | RELEELN                                                  | 451.7333                | 1.74        | -  | -   | +   | +   |
| 1 – 31   | RELEELNVPGEIVESLSSEESITRINKKIE                           | 962.6842                | 1.48        | -  | -   | -   | +   |
| 1 – 46   | RELEELNVPGEIVESLSSEESITRINKKIEKFQSEEQQQTEDELQ            | 1444.6275               | -0.77       | -  | -   | +   | -   |
| 1 – 52   | RELEELNVPGEIVESLSSEESITRINKKIEKFQSEEQQQTEDELQDKIHFP      | 1303.3819               | 0.26        | -  | -   | +   | -   |
| 1 – 56   | RELEELNVPGEIVESLSSEESITRINKKIEKFQSEEQQQTEDELQDKIHHPFAQTQ | 1157.6858               | -0.38       | -  | -   | -   | +   |
| 29 – 52  | KIEKFQSEEQQQTEDELQDKIHFP                                 | 764.3559                | -2.37       | -  | -   | +   | -   |
| 32 – 46  | KFQSEEQQQTEDELQ                                          | 973.9053                | 0.95        | -  | -   | -   | +   |
| 32 – 52  | KFQSEEQQQTEDELQDKIHFP                                    | 895.4002                | -0.57       | -  | -   | -   | +   |
| 32 – 56  | KFQSEEQQQTEDELQDKIHHPFAQTQ                               | 1038.1332               | -1.39       | -  | -   | -   | +   |
| 43 – 56  | DELQDKIHHPFAQTQ                                          | 835.4124                | -0.24       | -  | -   | -   | +   |
| 43 – 68  | DELQDKIHHPFAQTQSLVYPFGPIPN                               | 984.5049                | 2.2         | -  | -   | +   | +   |
| 43 – 72  | DELQDKIHHPFAQTQSLVYPFGPIPNSLPQ                           | 844.9368                | 1.21        | -  | -   | -   | +   |
| 47 – 56  | DKIHHPFAQTQ                                              | 592.8065                | -0.15       | -  | -   | +   | -   |
| 47 – 68  | DKIHHPFAQTQSLVYPFGPIPN                                   | 822.7658                | 0.53        | -  | +   | +   | +   |
| 47 – 72  | DKIHHPFAQTQSLVYPFGPIPNSLPQ                               | 964.512                 | 4.29        | -  | +   | +   | +   |
| 47 – 96  | DKIHHPFAQTQSLVYPFGPIPNSLPQNIPPLTQTPVVVPPFLQPEVMGVS       | 1358.7254               | -0.13       | -  | -   | +   | -   |
| 57 – 68  | SLVYPFGPIPN                                              | 650.8511                | 1.03        | -  | -   | -   | +   |
| 73 – 99  | NIPPLTQTPVVVPPFLQPEVMGVSKVK                              | 972.2206                | -0.055      | -  | -   | +   | +   |
| 83 – 97  | VVPPFLQPEVMGVSK                                          | 813.9505                | 0.8         | -  | -   | -   | +   |
| 83 – 99  | VVPPFLQPEVMGVSKVK                                        | 618.6927                | 4.18        | -  | -   | +   | +   |
| 92 – 97  | VMGVSK                                                   | 310.6755                | 0.17        | +  | +   | +   | +   |
| 94 – 102 | GVSKVKEAM                                                | 474.7633                | 1.15        | -  | -   | +   | +   |
| 94 – 105 | GVSKVKEAMAPK                                             | 415.573                 | 1.02        | +  | +   | +   | -   |
| 95 – 100 | VSKVKE                                                   | 345.2136                | 1.15        | -  | -   | +   | -   |

|           |                                                              |           |       |   |   |   |   |
|-----------|--------------------------------------------------------------|-----------|-------|---|---|---|---|
| 97 – 105  | KVKEAMAPK                                                    | 334.5324  | 1.49  | - | + | + | + |
| 97 – 99   | KVK                                                          | 374.2764  | 0.52  | - | - | + | + |
| 98 – 105  | VKEAMAPK                                                     | 437.2478  | 2.47  | - | - | - | + |
| 100 – 105 | EAMAPK                                                       | 323.6657  | 2.12  | - | - | - | + |
| 100 – 133 | EAMAPKHKEMPFKYPVEPFOTESQSLTLTDVENL                           | 781.5897  | 0.3   | - | - | + | - |
| 100 – 139 | EAMAPKHKEMPFKYPVEPFOTESQSLTLTDVENLHLLPL                      | 763.2287  | 0.2   | - | - | + | - |
| 102 – 105 | MAPK                                                         | 446.2439  | 1.65  | - | + | - | - |
| 103 – 105 | APK                                                          | 315.2028  | 0.41  | - | + | - | - |
| 103 – 124 | APKHKEMPFKYPVEPFOTESQS                                       | 515.6616  | 3.55  | - | - | - | + |
| 103 – 139 | APKHKEMPFKYPVEPFOTESQSLTLTDVENLHLLPL                         | 849.4494  | 0.69  | - | - | - | + |
| 103 – 163 | APKHKEMPFKYPVEPFOTESQSLTLTDVENLHLLPLLLQSWMHQPHQLPPTVMFPPQSVL | 1170.7745 | -0.34 | - | - | - | + |
| 106 – 163 | HKEMPFKYPVEPFOTESQSLTLTDVENLHLLPLLLQSWMHQPHQLPPTVMFPPQSVL    | 1121.4099 | -0.73 | - | - | - | + |
| 128 – 139 | TDVENLHLLPL                                                  | 680.8787  | 2.2   | - | - | + | + |
| 129 – 139 | DVENLHLLPL                                                   | 630.3539  | 0.96  | - | + | + | + |
| 129 – 141 | DVENLHLLPLLLQ                                                | 750.9232  | -1.97 | - | - | - | + |
| 129 – 143 | DVENLHLLPLLLQSW                                              | 887.4804  | 0.12  | - | - | + | + |
| 133 – 142 | LHLLPLLLQS                                                   | 565.8505  | 0.4   | - | + | + | + |
| 135 – 141 | LPLLLQ                                                       | 397.2622  | -1.39 | + | + | + | + |
| 135 – 142 | LPLLLQS                                                      | 440.7796  | 1.97  | + | + | + | + |
| 144 – 156 | MHQPHQLPPTVM                                                 | 504.9207  | 1.72  | - | - | + | + |
| 144 – 160 | MHQPHQLPPTVMFPPQ                                             | 661.3321  | 2.07  | - | + | - | - |
| 144 – 175 | MHQPHQLPPTVMFPPQSVLSLSQSKVLPVPQ                              | 886.9753  | -0.37 | - | + | - | - |
| 145 – 156 | HQPHQLPPTVM                                                  | 461.2405  | 1.81  | - | - | - | + |
| 145 – 163 | HQPHQLPPTVMFPPQSVL                                           | 717.3793  | 0.79  | - | - | + | + |
| 145 – 175 | HQPHQLPPTVMFPPQSVLSLSQSKVLPVPQ                               | 854.2176  | 2.46  | - | - | + | - |
| 161 – 175 | SVLSLSQSKVLPVPQ                                              | 791.4661  | 2.48  | + | + | + | + |
| 161 – 176 | SVLSLSQSKVLPVPQK                                             | 570.6782  | 2.42  | + | + | + | - |
| 161 – 182 | SVLSLSQSKVLPVPQKAVPYPQ                                       | 789.1221  | 1.13  | + | + | - | - |

|           |                                                |           |        |   |   |   |   |
|-----------|------------------------------------------------|-----------|--------|---|---|---|---|
| 161 – 183 | SVLSLSQSKVLPVPQKAVPYPQR                        | 631.1193  | 2.11   | + | + | + | - |
| 162 – 175 | VLSLSQSKVLPVPQ                                 | 747.9488  | 0.93   | + | - | - | - |
| 164 – 174 | SLSQSKVLPVP                                    | 577.8418  | -1.36  | - | - | + | - |
| 164 – 175 | SLSQSKVLPVPQ                                   | 641.8737  | 2.83   | + | + | + | + |
| 164 – 176 | SLSQSKVLPVPQK                                  | 470.9491  | 0.84   | - | + | + | + |
| 164 – 182 | SLSQSKVLPVPQKAVPYPQ                            | 689.3935  | 0.72   | + | + | + | + |
| 164 – 183 | SLSQSKVLPVPQKAVPYPQR                           | 741.4275  | 1.13   | + | + | + | + |
| 164 – 186 | SLSQSKVLPVPQKAVPYPQRDMP                        | 642.101   | -1.44  | - | - | - | + |
| 164 – 190 | SLSQSKVLPVPQKAVPYPQRDMPIQAF                    | 1008.8825 | -0.33  | - | - | + | + |
| 164 – 192 | SLSQSKVLPVPQKAVPYPQRDMPIQAFLL                  | 1084.2691 | -2.88  | - | - | + | - |
| 164 – 209 | SLSQSKVLPVPQKAVPYPQRDMPIQAFLLYQEPVLGPVRGPFPIIV | 1278.9673 | -0.009 | - | - | - | + |
| 165 – 167 | LSQ                                            | 347.1926  | 0.33   | + | - | - | - |
| 166 – 175 | SQSKVLPVPQ                                     | 541.8158  | 3.53   | + | + | + | + |
| 166 – 176 | SQSKVLPVPQK                                    | 404.2441  | 1.89   | - | - | - | + |
| 166 – 182 | SQSKVLPVPQKAVPYPQ                              | 622.6891  | 2.36   | + | + | + | + |
| 166 – 183 | SQSKVLPVPQKAVPYPQR                             | 506.2939  | 2.16   | - | + | + | + |
| 167 – 182 | QSKVLPVPQKAVPYPQ                               | 593.6773  | 0.54   | - | + | - | - |
| 167 – 183 | QSKVLPVPQKAVPYPQR                              | 484.5359  | 2.23   | + | + | + | + |
| 169 – 175 | KVLPVPQ                                        | 390.7526  | 0.16   | - | - | - | + |
| 169 – 183 | KVLPVPQKAVPYPQR                                | 430.7627  | 1.3    | - | - | + | + |
| 170 – 175 | VLPVPQ                                         | 652.4025  | -0.5   | - | - | + | - |
| 170 – 176 | VLPVPQK                                        | 390.7531  | 1.35   | - | - | - | + |
| 170 – 182 | VLPVPQKAVPYPQ                                  | 718.4192  | 0.26   | - | - | + | + |
| 170 – 183 | VLPVPQKAVPYPQR                                 | 531.3156  | 0.25   | - | + | + | + |
| 170 – 186 | VLPVPQKAVPYPQRDMP                              | 645.6899  | 1.62   | + | + | + | + |
| 170 – 209 | VLPVPQKAVPYPQRDMPIQAFLLYQEPVLGPVRGPFPIIV       | 1121.384  | 0.047  | + | - | - | - |
| 171 – 175 | LPVPQ                                          | 553.3354  | 1.74   | - | + | + | - |
| 171 – 182 | LPVPQKAVPYPQ                                   | 668.8829  | -2.78  | - | + | + | + |

|           |                                    |           |        |   |   |   |   |
|-----------|------------------------------------|-----------|--------|---|---|---|---|
| 171 – 183 | LPVPQKAVPYPQR                      | 498.293   | 0.67   | - | - | + | + |
| 172 – 175 | PVPQ                               | 440.2508  | 0.92   | - | + | - | - |
| 176 – 188 | KAVPYPQRDMPIQ                      | 514.9427  | 2.51   | - | + | - | - |
| 176 – 190 | KAVPYPQRDMPIQAF                    | 880.9597  | -1.79  | - | - | + | - |
| 176 – 209 | KAVPYPQRDMPIQAFLLYQEPVLGPVRGPFPIIV | 1283.7151 | 0.48   | + | - | - | - |
| 177 – 186 | AVPYPQRDMP                         | 587.2904  | 1.15   | - | - | + | - |
| 177 – 189 | AVPYPQRDMPIQA                      | 743.3809  | 1.86   | - | + | - | - |
| 178 – 186 | VPYPQRDMP                          | 551.7727  | 2.87   | - | + | + | - |
| 178 – 190 | VPYPQRDMPIQAF                      | 781.3957  | 0.56   | + | + | + | - |
| 179 – 182 | PYPQ                               | 504.2459  | 1.21   | + | + | + | + |
| 180 – 190 | YPQRDMPIQAF                        | 683.3353  | 0.99   | - | - | + | - |
| 183 – 189 | RDMPIQA                            | 830.4175  | -1.66  | - | - | - | + |
| 183 – 190 | RDMPIQAF                           | 489.248   | 1.47   | + | + | + | + |
| 183 – 191 | RDMPIQAFL                          | 545.7908  | 2.75   | - | + | - | - |
| 183 – 192 | RDMPIQAFL                          | 602.3327  | 2.25   | + | + | + | - |
| 183 – 193 | RDMPIQAFLLY                        | 683.8633  | 0.43   | + | + | + | + |
| 183 – 209 | RDMPIQAFLLYQEPVLGPVRGPFPIIV        | 1022.571  | -0.81  | + | + | + | + |
| 186 – 188 | PIQ                                | 357.2136  | 1.13   | - | - | + | - |
| 189 – 209 | AFLLYQEPVLGPVRGPFPIIV              | 1163.1726 | 0.39   | + | - | - | - |
| 190 – 209 | FLLYQEPVLGPVRGPFPIIV               | 1127.655  | 1.28   | - | - | - | + |
| 191 – 193 | LLY                                | 408.2499  | 1.51   | + | + | + | + |
| 191 – 202 | LLYQEPVLGPVR                       | 692.4041  | 1.09   | + | + | + | + |
| 191 – 206 | LLYQEPVLGPVRGPF                    | 891.4999  | -1.36  | + | + | + | + |
| 191 – 209 | LLYQEPVLGPVRGPFPIIV                | 1054.1213 | 1.83   | - | + | + | + |
| 192 – 202 | LYQEPVLGPVR                        | 635.8621  | 1.2    | - | - | - | + |
| 192 – 206 | LYQEPVLGPVRGPF                     | 834.9604  | 1.61   | + | + | + | + |
| 192 – 209 | LYQEPVLGPVRGPFPIIV                 | 997.5772  | -0.085 | - | - | - | + |
| 193 – 202 | YQEPVLGPVR                         | 579.3201  | 1.39   | + | + | + | + |

|           |                   |          |        |   |   |   |   |
|-----------|-------------------|----------|--------|---|---|---|---|
| 193 – 204 | YQEPVLGPVRGP      | 656.3571 | 1.11   | - | + | + | + |
| 193 – 206 | YQEPVLGPVRGPPF    | 778.417  | -0.017 | + | + | + | + |
| 193 – 207 | YQEPVLGPVRGPFPI   | 834.9619 | 3.39   | - | + | + | + |
| 193 – 209 | YQEPVLGPVRGPFPIIV | 941.0336 | -1.82  | + | + | + | + |
| 194 – 206 | QEPVLGPVRGPPF     | 696.8859 | 0.85   | + | + | + | + |
| 194 – 207 | QEPVLGPVRGPFPI    | 753.4273 | -0.16  | - | - | + | - |
| 194 – 209 | QEPVLGPVRGPFPIIV  | 859.5034 | -0.24  | - | + | + | + |
| 195 – 206 | EPVLGPVRGPPF      | 632.8557 | -0.59  | - | - | + | + |
| 196 – 198 | PVL               | 328.2235 | 1.24   | - | - | - | + |
| 200 – 202 | PVR               | 371.2403 | 0.61   | - | + | + | - |
| 207 – 209 | IIV               | 344.2545 | 0.31   | + | + | + | + |

**Table S7.** List of peptides identified at the different time points during hydrolysis of aS1-casein with PrtR1 from *Lactocaseibacillus casei* 2006

| Fragment | Sequence                            | Observed mass [M+H] <sup>+</sup> | Error (ppm) | 24h | 30h | 48h | 56h |
|----------|-------------------------------------|----------------------------------|-------------|-----|-----|-----|-----|
| 1 – 7    | RPKHPIK                             | 438.2818                         | -1.19       | +   | +   | +   | +   |
| 1 – 9    | RPKHPIKHQ                           | 570.8400                         | -1.82       | -   | -   | +   | -   |
| 1 – 13   | RPKHPIKHQGLPQ                       | 384.7294                         | 2.70        | -   | -   | +   | -   |
| 1 – 14   | RPKHPIKHQGLPQE                      | 416.9899                         | 1.98        | -   | -   | +   | -   |
| 1 – 16   | RPKHPIKHQGLPQEV                     | 376.2237                         | 1.38        | -   | -   | +   | -   |
| 1 – 22   | RPKHPIKHQGLPQEVNENLLR               | 654.8769                         | 0.51        | +   | +   | +   | +   |
| 1 – 23   | RPKHPIKHQGLPQEVNENLLRF              | 691.6442                         | 0.83        | +   | +   | +   | +   |
| 1 – 24   | RPKHPIKHQGLPQEVNENLLRFF             | 582.9320                         | 3.28        | +   | +   | +   | +   |
| 1 – 36   | RPKHPIKHQGLPQEVNENLLRFFVAPFPEVFGKEK | 707.3972                         | 3.06        | +   | -   | -   | -   |
| 3 – 22   | KHPIKHQGLPQEVNENLLR                 | 473.4732                         | 2.62        | +   | +   | +   | +   |
| 3 – 23   | KHPIKHQGLPQEVNENLLRF                | 628.3555                         | 0.39        | -   | -   | +   | +   |
| 4 – 22   | HPIKHQGLPQEVNENLLR                  | 559.5644                         | 0.05        | -   | -   | +   | +   |
| 5 – 7    | PIK                                 | 357.2495                         | -0.25       | -   | +   | +   | +   |
| 8 – 16   | HQGLPQEV                            | 510.7781                         | 1.62        | -   | -   | +   | +   |
| 8 – 17   | HQGLPQEVN                           | 567.7997                         | 1.68        | +   | +   | +   | -   |
| 8 – 20   | HQGLPQEVNENL                        | 745.8849                         | 1.84        | +   | +   | +   | +   |
| 8 – 21   | HQGLPQEVNENLL                       | 802.4246                         | -1.17       | +   | +   | +   | +   |
| 8 – 22   | HQGLPQEVNENLLR                      | 587.3198                         | -0.10       | +   | +   | +   | +   |
| 8 – 23   | HQGLPQEVNENLLRF                     | 636.3415                         | -1.79       | +   | +   | +   | +   |
| 9 – 22   | QGLPQEVNENLLR                       | 811.9472                         | 0.67        | +   | -   | -   | -   |
| 10 – 22  | GLPQEVNENLLR                        | 498.9454                         | -3.94       | +   | +   | +   | +   |
| 10 – 23  | GLPQEVNENLLRF                       | 821.4505                         | -1.24       | +   | +   | +   | +   |
| 10 – 24  | GLPQEVNENLLRFF                      | 894.9883                         | 2.81        | -   | +   | +   | +   |
| 11 – 21  | LPQEVNENLL                          | 641.3578                         | 2.74        | -   | -   | -   | +   |

|         |                             |           |       |   |   |   |   |
|---------|-----------------------------|-----------|-------|---|---|---|---|
| 11 – 22 | LPQEVLENENLLR               | 719.4075  | 1.19  | + | + | + | + |
| 11 – 23 | LPQEVLENENLLRF              | 528.9628  | -0.43 | + | + | + | + |
| 11 – 24 | LPQEVLENENLLRFF             | 577.9872  | 2.49  | - | - | + | + |
| 12 – 22 | PQEVLENENLLR                | 662.8641  | -0.74 | - | - | + | + |
| 13 – 22 | QEVLENENLLR                 | 614.3383  | 0.22  | + | + | + | + |
| 13 – 23 | QEVLENENLLRF                | 687.8720  | -0.62 | - | - | - | + |
| 14 – 22 | EVLNENLLR                   | 550.3095  | 1.04  | + | + | + | + |
| 14 – 23 | EVLNENLLRF                  | 623.8433  | 0.22  | + | + | + | + |
| 14 – 24 | EVLNENLLRFF                 | 697.3778  | 0.63  | - | - | + | - |
| 15 – 22 | VLNENLLR                    | 485.7880  | 0.78  | + | + | + | + |
| 15 – 23 | VLNENLLRF                   | 559.3226  | 1.40  | + | + | + | + |
| 16 – 22 | LNENLLR                     | 436.2548  | 3.21  | + | + | + | + |
| 16 – 23 | LNENLLRF                    | 509.7888  | 2.25  | + | + | + | + |
| 17 – 24 | NENLLRFF                    | 526.7795  | -0.62 | - | + | - | - |
| 23 – 35 | FFVAPFPEVFGKE               | 757.3921  | 2.90  | - | - | - | + |
| 24 – 34 | FVAPFPEVFGK                 | 619.3329  | -2.45 | + | + | + | - |
| 24 – 35 | FVAPFPEVFGKE                | 683.8562  | 0.76  | + | - | + | + |
| 24 – 37 | FVAPFPEVFGKEKV              | 531.9626  | 3.63  | - | - | + | - |
| 24 – 42 | FVAPFPEVFGKEKVNELSK         | 542.0481  | 3.07  | - | - | + | + |
| 24 – 50 | FVAPFPEVFGKEKVNELSKDIGSESTE | 1048.4792 | -0.96 | - | - | + | - |
| 25 – 34 | VAPFPEVFGK                  | 545.8014  | 2.17  | + | + | + | + |
| 25 – 36 | VAPFPEVFGKEK                | 449.9150  | -0.11 | - | + | + | + |
| 25 – 42 | VAPFPEVFGKEKVNELSK          | 505.2802  | 1.55  | - | - | + | + |
| 26 – 34 | APFPEVFGK                   | 496.2652  | -1.58 | - | - | - | + |
| 26 – 35 | APFPEVFGKE                  | 560.7867  | -1.07 | - | - | - | + |
| 26 – 36 | APFPEVFGKEK                 | 624.8351  | 0.46  | + | + | + | - |
| 28 – 35 | FPEVFGKE                    | 476.7433  | 1.90  | + | - | - | + |
| 55 – 57 | EDI                         | 376.1719  | 1.35  | + | - | - | - |

|           |                                |          |       |   |   |   |   |
|-----------|--------------------------------|----------|-------|---|---|---|---|
| 80 – 82   | HIQ                            | 397.2197 | 0.70  | + | + | + | - |
| 83 – 102  | KEDVPSERYLGYLEQLLRLK           | 817.1195 | -0.40 | - | - | - | + |
| 83 – 90   | KEDVPSE                        | 480.2440 | 1.61  | - | - | - | + |
| 83 – 92   | KEDVPSERYL                     | 412.5477 | 1.52  | - | - | - | + |
| 83 – 94   | KEDVPSERYLGY                   | 485.9097 | 2.19  | - | - | - | + |
| 85 – 100  | DVPSELYLGYLEQLLR               | 651.0151 | 1.23  | - | - | + | - |
| 85 – 102  | DVPSELYLGYLEQLLRLK             | 731.4083 | 1.37  | - | - | - | + |
| 92 – 94   | LGY                            | 352.1873 | 1.61  | + | - | - | - |
| 92 – 100  | LGYLEQLLR                      | 552.8256 | 2.59  | + | + | + | + |
| 92 – 101  | LGYLEQLLRL                     | 609.3680 | 2.84  | - | - | + | - |
| 92 – 102  | LGYLEQLLRLK                    | 449.2783 | 0.17  | - | - | + | + |
| 93 – 100  | GYLEQLLR                       | 496.2827 | 1.12  | + | + | + | + |
| 93 – 102  | GYLEQLLRLK                     | 411.5833 | -0.51 | - | - | + | + |
| 94 – 100  | YLEQLLR                        | 467.7722 | 1.61  | + | + | + | + |
| 94 – 101  | YLEQLLRL                       | 524.3148 | 2.51  | + | + | + | + |
| 94 – 102  | YLEQLLRLK                      | 392.5769 | 1.26  | + | + | + | + |
| 95 – 100  | LEQLLR                         | 386.2398 | 0.09  | - | - | + | + |
| 95 – 101  | LEQLLRL                        | 442.7824 | 1.43  | + | + | + | + |
| 95 – 102  | LEQLLRLK                       | 338.2222 | 0.59  | - | + | + | - |
| 101 – 123 | LKKYKVPQLEIVPNSAEERLHSM        | 558.6950 | 1.50  | - | - | - | + |
| 101 – 130 | LKKYKVPQLEIVPNSAEERLHSMKEGIHAQ | 711.3734 | -0.47 | - | - | + | - |
| 103 – 121 | KYKVPQLEIVPNSAEERLH            | 777.4013 | -0.42 | - | - | + | - |
| 103 – 123 | KYKVPQLEIVPNSAEERLHSM          | 637.8215 | 0.49  | + | + | + | + |
| 103 – 128 | KYKVPQLEIVPNSAEERLHSMKEGIH     | 778.8954 | -1.67 | - | - | + | + |
| 103 – 129 | KYKVPQLEIVPNSAEERLHSMKEGIHA    | 637.5265 | 0.42  | - | - | + | - |
| 103 – 130 | KYKVPQLEIVPNSAEERLHSMKEGIHAQ   | 663.1395 | 2.41  | - | + | + | + |
| 104 – 121 | YKVPQLEIVPNSAEERLH             | 531.2873 | -0.85 | - | - | + | + |
| 104 – 123 | YKVPQLEIVPNSAEERLHSM           | 605.7988 | 2.22  | - | + | + | + |



|           |                               |           |       |   |   |   |   |
|-----------|-------------------------------|-----------|-------|---|---|---|---|
| 104 – 130 | YKVPQLEIVPNSAEERLHSMKEGIHAQ   | 796.6464  | -0.61 | - | - | + | + |
| 105 – 121 | KVPQLEIVPNSAEERLH             | 510.5145  | 2.06  | + | + | + | + |
| 105 – 123 | KVPQLEIVPNSAEERLHSM           | 753.0390  | -0.98 | - | - | + | + |
| 105 – 130 | KVPQLEIVPNSAEERLHSMKEGIHAQ    | 604.9054  | -1.50 | - | - | + | + |
| 106 – 108 | VPQ                           | 343.1979  | 0.86  | + | - | - | - |
| 106 – 121 | VPQLEIVPNSAEERLH              | 637.6511  | 0.81  | - | - | + | + |
| 106 – 123 | VPQLEIVPNSAEERLHSM            | 710.3424  | 1.43  | - | - | + | + |
| 106 – 130 | VPQLEIVPNSAEERLHSMKEGIHAQ     | 964.8069  | -0.42 | - | - | - | + |
| 109 – 114 | LEIVPN                        | 684.3929  | 0.30  | - | + | + | - |
| 109 – 119 | LEIVPNSAEER                   | 668.8115  | 1.03  | - | - | + | - |
| 109 – 121 | LEIVPNSAEERLH                 | 529.5925  | 3.52  | + | + | + | + |
| 109 – 123 | LEIVPNSAEERLHSM               | 602.2835  | 3.42  | + | + | + | + |
| 110 – 121 | EIVPNSAEERLH                  | 491.8969  | 1.92  | - | - | + | + |
| 110 – 123 | EIVPNSAEERLHSM                | 564.5869  | 0.13  | - | - | + | + |
| 111 – 121 | IVPNSAEERLH                   | 448.8820  | 0.51  | - | - | + | - |
| 111 – 123 | IVPNSAEERLHSM                 | 521.5737  | 2.08  | + | - | - | - |
| 112 – 121 | VPNSAEERLH                    | 411.1876  | 1.21  | - | - | + | - |
| 112 – 123 | VPNSAEERLHSM                  | 725.3140  | 1.02  | - | - | + | + |
| 115 – 123 | SAEERLHSM                     | 570.2317  | 0.95  | + | + | + | + |
| 115 – 130 | SAEERLHSMKEGIHAQ              | 476.4702  | 3.36  | - | - | + | - |
| 122 – 148 | SMKEGIHAQQKEPMIGVNQELAYFYFE   | 785.1339  | 2.19  | - | - | + | - |
| 124 – 143 | KEGIHAQQKEPMIGVNQELA          | 555.7914  | -0.09 | - | - | + | + |
| 124 – 148 | KEGIHAQQKEPMIGVNQELAYFYFE     | 730.6159  | 2.52  | + | + | + | + |
| 124 – 151 | KEGIHAQQKEPMIGVNQELAYFYFELFR  | 667.9455  | 3.15  | + | + | + | + |
| 124 – 152 | KEGIHAQQKEPMIGVNQELAYFYFELFRQ | 693.5584  | 4.70  | + | + | - | - |
| 131 – 154 | QKEPMIGVNQELAYFYFELFRQFY      | 1004.1675 | 2.37  | - | - | + | + |
| 132 – 143 | KEPMIGVNQELA                  | 664.8478  | 0.38  | - | - | + | - |
| 132 – 144 | KEPMIGVNQELAY                 | 746.3786  | -0.87 | - | - | + | - |

|           |                                |           |       |   |   |   |   |
|-----------|--------------------------------|-----------|-------|---|---|---|---|
| 136 – 152 | IGVNQELAYFYPELFRQ              | 696.3595  | 2.07  | - | - | - | + |
| 142 – 144 | LAY                            | 366.2029  | 1.51  | + | + | + | + |
| 144 – 151 | YFYPELFR                       | 567.7864  | 3.34  | - | - | + | - |
| 146 – 152 | YPELFRQ                        | 476.7485  | 1.00  | + | - | - | - |
| 147 – 149 | PEL                            | 358.1973  | 0.20  | - | - | + | + |
| 149 – 157 | LFRQFYQLD                      | 615.3198  | 0.87  | - | - | + | - |
| 170 – 194 | GTQYTDAPSFSDIPNPIGSENSEKT      | 885.7392  | -1.03 | - | - | + | - |
| 170 – 199 | GTQYTDAPSFSDIPNPIGSENSEKTTMPLW | 1095.1746 | -0.18 | - | - | + | + |
| 174 – 194 | TDAPSFSDIPNPIGSENSEKT          | 736.0089  | -1.12 | - | - | + | - |
| 174 – 199 | TDAPSFSDIPNPIGSENSEKTTMPLW     | 1417.6614 | -1.19 | - | - | + | - |
| 175 – 194 | DAPSFSDIPNPIGSENSEKT           | 1052.9871 | -0.03 | + | - | + | - |
| 179 – 194 | FSDIPNPIGSENSEKT               | 867.9111  | -1.81 | + | + | + | + |
| 179 – 199 | FSDIPNPIGSENSEKTTMPLW          | 1182.0642 | -0.53 | + | + | - | - |
| 181 – 194 | DIPNPIGSENSEKT                 | 750.8635  | 1.43  | + | + | + | + |
| 181 – 199 | DIPNPIGSENSEKTTMPLW            | 1065.0126 | -1.87 | + | + | + | + |
| 197 – 199 | PLW                            | 415.2342  | 0.55  | + | + | - | - |

### 3. References

- [1] Bottari, B., Felis, G.E., Salvetti, E., Castioni, A., Campedelli, I., Torriani, S., Gatti, M. (2017). Effective identification of *Lactobacillus casei* group species: genome-based selection of the gene *mutL* as the target of a novel multiplex PCR assay. *Microbiol* **2017**, *163*, 950–960.
- [2] Tagliazucchi, D., Baldaccini, A., Martini, S., Bianchi, A., Pizzamiglio, V., Solieri, L. Cultivable non-starter lactobacilli from ripened Parmigiano Reggiano cheeses with different salt content and their potential to release anti-hypertensive peptides. *Int J Food Microbiol* **2020**, *330*, 108688.
- [3] Solieri, L., Bianchi, A., Giudici, P. Inventory of non-starter lactic acid bacteria from ripened Parmigiano Reggiano cheese as assessed by a culture dependent multiphasic approach. *Syst Appl Microbiol* **2012**, *35*, 270–277.
- [4] Sato, H., Yanagida, F., Shinohara, T., Yokotsuka, K. Restriction fragment length polymorphism analysis of 16S rRNA genes in lactic acid bacteria isolated from red wine. *J. Biosci. Bioeng.* **2000**, *90*, 335–337.
- [5] Lopez, I., Ruiz-Larrea, F., Cocolin, L., Orr, E., Phister, T., Marshall, M., VanderGheynst, J., Mills, D.A. Design and evaluation of PCR primers for analysis of bacterial populations in wine by denaturing gradient gel electrophoresis. *Appl. Env. Microbiol.* **2003**, *69*, 6801–6807.
- [6] Thompson, J.D., Higgins, D.G., Gibson, T.J. CLUSTAL W: improving the sensitivity of progressive multiple sequence alignment through sequence weighting, position-specific gap penalties and weight matrix choice. *Nucleic Acids Res.* **1994**, *22*, 4673–4680.
- [7] Saitou N., Nei M. The neighbor-joining method: A new method for reconstructing phylogenetic trees. *Mol. Biol. Evol.* **1987**, *4*, 406–425.
- [8] Kimura M. A simple method for estimating evolutionary rate of base substitutions through comparative studies of nucleotide sequences. *J. Mol. Evol.* **1980**, *16*, 111–120.
- [9] Felsenstein J. Confidence limits on phylogenies: An approach using the bootstrap. *Evolution* **1985**, *39*, 783–791.
- [10] Tamura, K., Stecher, G., Peterson, D., Filipski, A., Kumar, S. MEGA6: Molecular Evolutionary Genetics Analysis version 6.0. *Mol. Biol. Evol.* **2013**, *30*, 2725–2729.
- [11] Letunic, I., Bork, P. Interactive Tree Of Life (iTOL) v4: recent updates and new developments. *Nucleic Acid Res* **2019**, *47*, W256–W259.
- [12] Papadopoulos, J.S., Agarwala, R. COBALT: constraint-based alignment tool for multiple protein sequences. *Bioinformatics* **2007**, *23*, 1073–1079.
- [13] Waterhouse, A.M., Procter, J.B., Martin, D.M.A., Clamp, M., Barton, G.J. Jalview Version 2—a multiple sequence alignment editor and analysis workbench. *Bioinformatics*, **2009**, *25*, 1189–1191.
- [14] Rodas, A.M., Ferrer, S., Pardo, I. 16S-ARDRA, a tool for identification of lactic acid bacteria isolated from grape must and wine. *System. Appl. Microbiol.* **2003**, *26*, 412–422.
- [15] Ward, L.H.J., Timmins, M.J. Differentiation of *Lactobacillus casei*, *Lactobacillus paracasei* and *Lactobacillus rhamnosus* by polymerase chain reaction. *Lett. Appl. Microbiol.* **1999**, *29*, 90–92.
- [16] Ventura, M., Canchaya, C., Meylan, V., Klaenhammer, T.R., Zink, R. Analysis, characterization, and loci of the *tuf* genes in *Lactobacillus* and *Bifidobacterium* species and their direct application for species identification. *Appl. Env. Microbiol.* **2003**, *69*, 6908–6922.
- [17] Liu, D.D., Gu, C.T. Proposal to reclassify *Lactobacillus zhaodongensis*, *Lactobacillus zeae*, *Lactobacillus argentoratensis* and *Lactobacillus buchneri* subsp. *silagei* as *Lactocaseibacillus zhaodongensis* comb. nov., *Lactocaseibacillus zeae* comb. nov., *Lactiplantibacillus argentoratensis* comb. nov. and *Lentilactobacillus buchneri* subsp. *silagei* comb. nov., respectively and *Apilactobacillus kosoi* as a later heterotypic synonym of *Apilactobacillus micheneri*. *Int J Syst Evol*, **2020**, *70*, 6414–6417.
